# Supplementary material for: T-DNAreader: Fast and precise identification of T-DNA insertion sites in plant genomes using RNA-sequencing data
Source: Research Square preprint supplement (doi:10.21203/rs.3.rs-5370767/v1), 2024-11-21
Supplement: Supplementary file 1 [file b8ddd1e0e2c2ede668e8e15a.xlsx]

## Sheet: Table S1
Supplementary Table S1. Next-generation sequencing datasets used in this study.
Arabidopsis T-DNA insertion mutants
Control name	Control-rep1	Control-rep2	Control-rep3	Mutant name	Mutant-rep1	Mutant-rep2	Mutant-rep3	Layout	Read length	T-DNA stock name	Reference
Col-0	SRR13765623	SRR13765624	SRR13765625	floe1-1	SRR13765632	SRR13765633	SRR13765634	Paired	150	SALK_048257C	Dorone et al., 2021
Col-0	SRR13963588	SRR13963589	SRR13963590	ctl1-2	SRR13963591	SRR13963592	SRR13963593	Single	101	SALK_093049	Menna et al., 2021
Col-0	SRR14214600	SRR14214601		fio1-2	SRR14214604	SRR14214605		Paired	150	SALK_209355	Sun et al., 2022
Col-0	SRR14765659	SRR14765660		swo1-2	SRR14765661	SRR14765662		Paired	150	SALK_201050C	Wang et al., 2021
Col-0	SRR14850975	SRR14850976		plt1-21 plt2-21	SRR14850977	SRR14850978		Paired	151	SALK_116254,GK-297D04-015553	Zhai and Xu, 2021
Col-0	SRR15192943	SRR15192944	SRR15192945	rve5-2	SRR15192949	SRR15192950	SRR15192951	Paired	139	GK_225C06	Li et al., 2023
Col-0	SRR15209912	SRR15209913	SRR15209914	vil1-1	SRR15209915	SRR15209916	SRR15209917	Single	101	SALK_136506	Zong et al., 2022
Col-0	SRR15295391	SRR15295392	SRR15295393	cfm6-1	SRR15295394	SRR15295395	SRR15295396	Single	101	SALK_081355	Lin et al., 2022
Col-0	SRR15296033	SRR15296034	SRR15296035	scl30a-1	SRR15296036	SRR15296037	SRR15296038	Paired	125	SALK_041849	Laloum et al., 2023
Col-0	SRR15501903	SRR15501904	SRR15501905	scl28-3	SRR15501906	SRR15501907	SRR15501908	Single	51	SALK_205284	Goldy et al., 2023
Col-0	SRR16047744	SRR16047745		atxr5-1 atxr6-1 tsk-4	SRR16047732	SRR16047735		Paired	151	SALK_130607,SAIL_240_H01,SALK_034207	Davarinejad et al., 2022
Col-0	SRR16117209	SRR16117210	SRR16117211	bzip17-1	SRR16117203	SRR16117204	SRR16117205	Paired	139	SALK_104326	Gao et al., 2022
Col-0	SRR16490690	SRR16490691	SRR16490692	val1-2 val2-1 pkl1-6	SRR16490693	SRR16490694	SRR16490695	Paired	150	SALK_088606,SALK_059568,SALK_033554	Liang et al., 2022
Col-0	SRR16770635	SRR16770637		jmj28-2	SRR16770639	SRR16770641		Paired	151	SALK_019427	Xie et al., 2023
Col-0	SRR18534100	SRR18534101	SRR18534102	ada2a-3	SRR18534097	SRR18534098	SRR18534099	Paired	150	SALK_150349	Wu et al., 2023
				ada2b	SRR18534094	SRR18534095	SRR18534096	Paired	150	SALK_009793	Wu et al., 2023
				hag1-2	SRR18534091	SRR18534092	SRR18534093	Paired	150	SALK_030913C	Wu et al., 2023
				ing1	SRR18534088	SRR18534089	SRR18534090	Paired	150	SALK_009598C	Wu et al., 2023
				spc	SRR18534085	SRR18534086	SRR18534087	Paired	150	SALK_147258	Wu et al., 2023
				eaf6	SRR18534082	SRR18534083	SRR18534084	Paired	150	SALK_026622	Wu et al., 2023
				sdrl	SRR18534079	SRR18534080	SRR18534081	Paired	150	SALK_125505	Wu et al., 2023
Col-0	SRR18441662	SRR18441663	SRR18441664	nlp7-1	SRR18441634	SRR18441635	SRR18441636	Paired	150	SALK_026134	Durand et al., 2023
Col-0	SRR18937093	SRR18937094		ubp12-2w ubp13-3	SRR18937085	SRR18937086		Single	76	GABI_742C10,SALK_132368	Lindback et al., 2022
Col-0	SRR19019343	SRR19019344	SRR19019345	aar2-2	SRR19019337	SRR19019338	SRR19019339	Paired	150	SALK_117746	Fan et al., 2022
Col-0	SRR19448970	SRR19448971	SRR19448972	tpf1-1 tpf2-1	SRR19448967	SRR19448968	SRR19448969	Single	100	SALK_010411C,SALK_141512C	Diego-Martin et al., 2022
				minu1-2 minu2-1	SRR19448964	SRR19448965	SRR19448966	Single	100	GK-146E09,SALK_057856C	Diego-Martin et al., 2022
Col-0	SRR21851407	SRR21851408	SRR21851409	bcl7a-1 bcl7b-1	SRR21851398	SRR21851399	SRR21851400	Paired	150	SALK_027934,SALK_029285	Lei et al., 2024
				brm-1	SRR21851392	SRR21851393	SRR21851394	Paired	150	SALK_030046	Lei et al., 2024
				brm-3	SRR21851395	SRR21851396	SRR21851397	Paired	150	SALK_088462	Lei et al., 2024
Col-0	SRR21906860	SRR21906861	SRR21906862	atchz1a-1 atchz1b-1 arp6-1	SRR21906845	SRR21906846	SRR21906847	Paired	150	GK_413F08,GK_542E05,Garlic_599_G03	Wu et al., 2023
Col-0	SRR22423438	SRR22423439	SRR22423440	syd-5	SRR22423435	SRR22423436	SRR22423437	Paired	150	SALK_023209	Fu et al., 2023
				swi3d-1	SRR22423432	SRR22423433	SRR22423434	Paired	150	SALK_100310	Fu et al., 2023
Col-0	SRR12554208	SRR12554209		aipp2-1	SRR12554212	SRR12554213		Paired	151	SALK_057771	Zhang et al., 2020
				aipp3-1	SRR12554210	SRR12554211		Paired	151	GK_058D11	Zhang et al., 2020
				cpl2-2	SRR12554218	SRR12554219		Paired	151	SALK_059753	Zhang et al., 2020
Col-0	SRR11300784	SRR11300785	SRR11300786	xpo4-2	SRR11300787	SRR11300788		Paired	150	SALK_093159	Xu et al., 2021
Col-0	SRR11110274	SRR11110275		chr11 chr17	SRR11110276	SRR11110277		Single	50	GK_424F01,SALK_080144	Luo et al., 2020
				cmt3-11	SRR10990381	SRR10990382		Paired	150	SALK_148381	Ning et al., 2020
Col-0	SRR10959650	SRR10959651	SRR10959652	sgn3-3	SRR10959653	SRR10959654	SRR10959655	Single	126	SALK_043282	Fujita et al., 2020
Col-0	SRR10502544	SRR10502545	SRR10502546	chr4-2	SRR10502548	SRR10502549	SRR10502550	Single	150	SAIL_783_C05	Sang et al., 2020
Col-0	SRR10320043	SRR10320044	SRR10320045	vip3-1	SRR10320046	SRR10320047	SRR10320048	Single	50	SALK_139885	Fal et al., 2019
Col-0	SRR9672852	SRR9672853	SRR9672854	hac1-1	SRR9672855	SRR9672856	SRR9672857	Paired	100	SALK_080380	Hinckley et al., 2019
				hac1-2	SRR9672858	SRR9672859	SRR9672860	Paired	100	SALK_136314	Hinckley et al., 2019
Col-0	SRR9610017	SRR9610018		fry1-6 rdr1-1	SRR9610023	SRR9610024		Paired	150	SALK_020882,SAIL_672F11	You et al., 2019
Col-0	SRR9273386	SRR9273387	SRR9273388	dxo1-1	SRR9273389	SRR9273390	SRR9273391	Paired	150	SALK_103157	Pan et al., 2020
				dxo1-2	SRR9273392	SRR9273393	SRR9273394	Paired	150	SALK_032903	Pan et al., 2020
Col-0	SRR8759751	SRR8759752	SRR8759753	klu-1	SRR8759754	SRR8759755	SRR8759756	Paired	151	SALK_024697C	Jiang et al., 2021
Col-0	SRR8380412	SRR8380413		hdc1	SRR8380416	SRR8380417		Paired	150	SALK_043645	Ning et al., 2019
				hda19-3	SRR8380418	SRR8380419		Paired	150	SALK_139445	Ning et al., 2019
Col-0	SRR2927091	SRR2927092		atx3-1 atx4-1 atx5-1	SRR2927093	SRR2927094		Paired	125	GK-128H01,SALK_060156,WiscDsLoxHs127_10D	Chen et al., 2017
Col-0	SRR2177545	SRR2177546	SRR2177547	brm-1 ref6-1	SRR2177554	SRR2177555	SRR2177556	Paired	101	SALK_030046,SALK_001018	Li et al., 2016
Col-0	SRR2133807	SRR2133808	SRR2133809	smxl4-1 smxl5-1	SRR2133813	SRR2133814	SRR2133815	Single	50	SALK_037136,SALK_018522	Wallner et al., 2017
				smax1-2	SRR2133816	SRR2133817	SRR2133818	Single	50	SALK_128579	Wallner et al., 2017
Col-0	SRR1818387	SRR1818388	SRR1818389	wrky33-2	SRR1818393	SRR1818394	SRR1818395	Single	100	GABI_324B11	Liu et al., 2015
Col-0	SRR1761506	SRR1761507	SRR1761508	ros1-4	SRR1761518	SRR1761519	SRR1761520	Paired	101	SALK_045303	Kim et al., 2019
Col-0	SRR1931614	SRR2500947		swn-21	SRR2500948	SRR2962412		Paired	151	GABI_783A01	Wang e al., 2016
Col-0	SRR6453489	SRR6453490	SRR6453491	swn-4	SRR6453495	SRR6453496	SRR6453497	Paired	150	SALK_109121	Shu et al., 2019
Note : WiscDsLox and Garlic lines were not included in the analysis
Arabidopsis overexpression RNA-seq
Control name	Control-rep1	Control-rep2	Control-rep3	Transgenic plant	Transgenic-rep1	Transgenic-rep2	Transgenic-rep3	Layout	Read length	Gene name	Reference
Col-0	SRR15249832	SRR15249833	SRR15249834	GmNTL4-OX	SRR15249835	SRR15249836	SRR15249837	Single	150	GmNTL	Lin et al., 2021
Col-0	SRR9729448	SRR9729449		GBPL3-OX	SRR9729454	SRR9729455		Paired	150	GBPL3	Huang et al., 2021
Col-0	SRR24825714	SRR24825715	SRR24825716	ROT4-OX	SRR24825711	SRR24825712	SRR24825713	Paired	150	ROT4	Li et al., 2024
Col-0	SRR19659666	SRR19659667	SRR19659668	HaFT-OX	SRR19659669	SRR19659678	SRR19659679	Paired	150	HaFT	Pan et al., 2023
Col-0	SRR17168772	SRR17168773		VdSSR1-OX	SRR17168770	SRR17168771		Paired	151	VdSSR1	Zhu et al., 2022
Col-0	SRR8759751	SRR8759752	SRR8759753	KLU-OX1	SRR8759757	SRR8759758	SRR8759759	Paired	151	KLU	Jiang et al., 2021
Col-0				KLU-OX2	SRR8759760	SRR8759761	SRR8759762	Paired	151	KLU	Jiang et al., 2021
Col-0	SRR5196725	SRR5196726		ZAT18-OX	SRR5196727	SRR5196728		Paired	150	ZAT18	Yin et al., 2017
Col-0	SRR26151165	SRR26151166	SRR26151167	SLIM1OX-1	SRR26151156	SRR26151157	SRR26151158	Paired	150	SLIM1	Apodiakou et al., 2024
Col-0				SLIM1OX-2	SRR26151159	SRR26151160	SRR26151161	Paired	150	SLIM1	Apodiakou et al., 2024
Col-0	SRR24825031	SRR24825032	SRR24825033	GhAPR2-OX	SRR24825028	SRR24825029	SRR24825030	Paired	150	GhAPR2	Mao et al., 2024
Arabidopsis ChIP-seq input data
Transgenic plant	Transgenic-rep1	Transgenic-rep2	Transgenic-rep3	Layout	Read length	Reference
35S::TPR2-Myc	SRR28741057	SRR28741058		Single	151	Zeng et al., 2024
atx1-2	SRR19212741	SRR19212744		Paired	150	Wang et al., 2024
clf-28	SRR19212754	SRR19212757		Paired	150	Wang et al., 2024
atxr5 atxr6	SRR24938933	SRR24938937		Paired	150	Wang et al., 2023
ADCP1-GFP	SRR24709451	SRR24709452		Paired	150	Zhang et al., 2024
ING1-GFP	SRR18534275			Paired	150	Wu et al., 2023
GCN5-GFP	SRR18534278			Paired	150	Wu et al., 2023
ADA2B-GFP	SRR18534281			Paired	150	Wu et al., 2023
ADA2A-GFP	SRR18534284			Paired	150	Wu et al., 2023
ddm1-1 rdr2 rdr6-11	SRR30163245	SRR30163246		Paired	150	Shimada and Saze, 2024
Rice WGS data
Transgenic plant	Transgenic line 1 (s1)	Transgenic line 2 (s2)	Transgenic line 3 (s3)	Layout	Read length	Reference
46bAG	SRR16230406	SRR16230407	SRR16230408	Paired	150	Li et al., 2022
46bGG	SRR16230409	SRR16230410	SRR16230411	Paired	150	Li et al., 2022
46bM	SRR16230412	SRR16230413	SRR16230414	Paired	150	Li et al., 2022
46bg	SRR16230415	SRR16230416	SRR16230417	Paired	150	Li et al., 2022
49bAG	SRR16230418	SRR16230419	SRR16230420	Paired	150	Li et al., 2022
49bM	SRR16230422	SRR16230423	SRR16230424	Paired	150	Li et al., 2022
49bTm	SRR16230425	SRR16230426	SRR16230427	Paired	150	Li et al., 2022
49bg	SRR16230428	SRR16230429	SRR16230430	Paired	150	Li et al., 2022
50SE	SRR16230434	SRR16230435	SRR16230436	Paired	150	Li et al., 2022
50G	SRR16230437	SRR16230438	SRR16230439	Paired	150	Li et al., 2022
50DEP	SRR16230440	SRR16230441	SRR16230442	Paired	150	Li et al., 2022
50bg	SRR16230443	SRR16230444	SRR16230445	Paired	150	Li et al., 2022
53SE	SRR16230446	SRR16230447	SRR16230448	Paired	150	Li et al., 2022
53G	SRR16230449	SRR16230450	SRR16230451	Paired	150	Li et al., 2022
53DEP	SRR16230452	SRR16230453	SRR16230454	Paired	150	Li et al., 2022
53bg	SRR16230455	SRR16230456	SRR16230457	Paired	150	Li et al., 2022
Arabidopsis Hi-C data
Genotype	Restriction enzyme	Replicate-1	Replicate-2	Reference
Col-0	DpnII	SRR9164344	SRR9164345	Sun et al., 2020
clf-28	DpnII	SRR16883208	SRR16883209	Sun et al., 2023
Col-0	DpnII	ERR9661572	ERR9661573	Yin et al., 2023
clf-28 swn-4	DpnII	ERR9661576	ERR9661577	Yin et al., 2023

## Sheet: Table S2
Supplementary Table S2. Summary of the T-DNAreader results from the RNA-seq datasets of the T-DNA insertion mutants.
Mutant name	T-DNA stock name	Layout	Read length	Genomic location	AGI number	TISs identified by T-DNAreader	Identified genes containing TISs	TIS identified by T-DNAreader using control data
floe1-1	SALK_048257C	Paired	150	Exon	AT4G28300	Chr4:14016003-TDNA	A4G28300	-
ctl1-2	SALK_093049	Single	101	Promoter	AT1G05850	-	-	-
fio1-2	SALK_209355	Paired	150	5'UTR	AT2G21070	-	-	-
swo1-2	SALK_201050C	Paired	150	Exon	AT4G17330	TDNA-Chr4:9696812	AT4G17330	-
plt1-21 plt2-21	SALK_116254 GK-297D04-015553	Paired	151	Exon Exon	AT3G20840 AT1G51190	Chr1:18979275-TDNA Chr1:18979291-TDNA Chr1:18979552-TDNA Chr1:18979571-TDNA TDNA-Chr1:18979576 Chr3:7302676-TDNA Chr3:7302693-TDNA	AT1G51190 AT3G20840	-
rve5-2	GK_225C06	Paired	139	Exon	AT4G01280	TDNA-Chr3:2923416 TDNA-Chr4:535550	AT3G09520 (promoter) AT4G01280	-
vil1-1	SALK_136506	Single	101	Exon	AT3G24440	-	-	-
cfm6-1	SALK_081355	Single	101	Exon	AT4G13070 AT5G25790	TDNA-Chr5:8977350	AT5G25790	-
scl30a-1	SALK_041849	Paired	125	Exon	AT3G13570	TDNA-Chr3:4431094	AT3G13570	-
scl28-3	SALK_205284	Single	51	Exon	AT1G63100	-	-	-
atxr5-1 atxr6-1 tsk-4	SALK_130607 SAIL_240_H01 SALK_034207	Paired	151	Exon 5'UTR Exon	AT5G09790 AT5G24330 AT3G18730	TDNA-Chr5:8297139 Chr5:9277770-TDNA	AT5G24330 AT5G26667	-
bzip17-1	SALK_104326	Paired	139	Exon	AT2G40950	TDNA-Chr2:17089643	AT2G40950	-
val1-2 val2-1 pkl1-6	SALK_088606 SALK_059568 SALK_033554	Paired	150	Exon Intron Intron	AT2G30470 AT4G32010 AT2G25170	Chr2:10722011-TDNA Chr2:10722115-TDNA TDNA-Chr2:12982820 Chr4:15483529-TDNA	AT2G25170 AT2G30470 AT4G32010	-
jmj28-2	SALK_019427	Paired	151	Exon	AT4G21430	TDNA-Chr4:11409647	AT4G21430	-
ada2a-3	SALK_150349	Paired	150	Exon	AT3G07740	-	-	-
ada2b	SALK_009793	Paired	150	5'UTR	AT4G16420	TDNA-Chr4:9262973	AT4G16420	Same control data with ada2a-3
hag1-2	SALK_030913C	Paired	150	Exon	AT3G54610	Chr3:20217222-TDNA	AT3G54610	Same control data with ada2a-3
ing1	SALK_009598C	Paired	150	intron	AT3G24010	Chr3:8677112-TDNA TDNA-Chr3:8677110	AT3G24010	Same control data with ada2a-3
spc	SALK_147258	Paired	150	intron	AT1G77800	Chr1:29256794-TDNA	AT1G77800	Same control data with ada2a-3
eaf6	SALK_026622	Paired	150	3'UTR	AT4G14385	TDNA-Chr4:8288079	AT4G14385	Same control data with ada2a-3
sdrl	SALK_125505	Paired	150	Exon	AT1G10310	Chr1:3383747-TDNA TDNA-Chr1:3383787	AT1G10310	Same control data with ada2a-3
nlp7-1	SALK_026134	Paired	150	Exon	AT4G24020	Chr4:12481127-TDNA Chr4:12481144-TDNA Chr4:12481171-TDNA	AT4G24020	-
ubp12-2w ubp13-3	GABI_742C10 SALK_132368	Single	76	Exon Intron	AT5G06600 AT3G11910	Chr3:3764252-TDNA TDNA-Chr5:2020272	AT3G11910 AT5G06600	-
aar2-2	SALK_117746	Paired	150	Intron	AT1G66510	Chr1:24813774-TDNA TDNA-Chr1:24813810	AT1G66510	-
tpf1-1 tpf2-1	SALK_010411C SALK_141512C	Single	100	Intron Exon	AT3G52100 AT3G08020	TDNA-Chr3:2558383	AT3G08020	-
minu1-2 minu2-1	GK-146E09 SALK_057856C	Single	100	Exon Exon	AT3G06010 AT5G19310	Chr3:1804531-TDNA TDNA-Chr3:1804542	AT3G06010	Same control data with tpf1-1 tpf2-1
bcl7a-1 bcl7b-1	SALK_027934 SALK_029285	Paired	150	Exon Exon	AT4G22320 AT5G55210	-	-	-
brm-1	SALK_030046	Paired	150	5'UTR	AT2G46020	Chr2:18923325-TDNA	AT2G46020	Same control data with bcl7a-1 bcl7b-1
brm-3	SALK_088462	Paired	150	Exon	AT2G46020	Chr2:18930116-TDNA	AT2G46020	Same control data with bcl7a-1 bcl7b-1
atchz1a-1 atchz1b-1	GK_413F08 GK_542E05	Paired	150	Exon Intron	AT4G08310 AT1G44780	TDNA-Chr1:16910627 Chr4:5249223-TDNA TDNA-Chr4:5249221	AT1G44780 AT4G08310	-
syd-5	SALK_023209	Paired	150	Exon	AT2G28290	-	-	-
swi3d-1	SALK_100310	Paired	150	Exon	AT4G34430	Chr4:16462950-TDNA Chr5:4039795-TDNA	AT4G34430 AT5G12440	Same control data with syd-5
aipp2-1	SALK_057771	Paired	151	Exon	AT3G02890	Chr3:643486-TDNA TDNA-Chr3:643504	AT3G02890	-
aipp3-1	GK_058D11	Paired	151	Intron	AT4G11560	TDNA-Chr4:7001643	AT4G11560	Same control data with aipp2-1
cpl2-2	SALK_059753	Paired	151	Intron	AT5G01270	Chr5:109308-TDNA TDNA-Chr5:109309	AT5G01270	Same control data with aipp2-1
xpo4-2	SALK_093159	Paired	150	Intron	AT3G04490	Chr3:1202357-TDNA	AT3G04490	-
chr11 chr17	GK_424F01 SALK_080144	Single	50	Exon Exon	AT3G06400 AT5G18620	-	-	-
cmt3-11	SALK_148381	Paired	150	Intron	AT1G69770	Chr1:26251334-TDNA Chr1:26251345-TDNA TDNA-Chr1:26251410 TDNA-Chr3:9537436	AT1G69770 AT3G26100	No control data
sgn3-3	SALK_043282	Single	126	Exon	AT4G20140	Chr4:10884540-TDNA TDNA-Chr4:10884536	AT4G20140	-
chr4-2	SAIL_783_C05	Single	150	Exon	AT5G44800	TDNA-Chr5:18088442	AT5G44800	-
vip3-1	SALK_139885	Single	50	Exon	AT4G29830	-	-	-
hac1-1	SALK_080380	Paired	100	Exon	AT1G79000	TDNA-Chr1:29722409	AT1G79000	-
hac1-2	SALK_136314	Paired	100	Exon	AT1G79000	TDNA-Chr1:29718877	AT1G79000	Same control data with hac1-1
fry1-6 rdr1-1	SALK_020882 SAIL_672_F11	Paired	150	Exon Exon	AT5G63980 AT1G14790	Chr1:5095561-TDNA TDNA-Chr1:5095579 Chr1:29466020-TDNA TDNA-Chr1:29466031 Chr3:21191623-TDNA Chr5:25610548-TDNA TDNA-Chr5:25610557 TDNA-Chr5:25610640 TDNA-Chr5:25610646 TDNA-Chr5:25610647 TDNA-Chr5:25610654	AT1G14790 AT1G09807 AT3G57270 AT5G63980	-
dxo1-1	SALK_103157	Paired	150	Exon	AT4G17620	Chr4:9822608-TDNA TDNA-Chr4:9822619	AT4G17620	-
dxo1-2	SALK_032903	Paired	150	Intron	AT4G17620	Chr4:9823290-TDNA Chr4:9823335-TDNA	AT4G17620	Same control data with dxo1-1
klu-1	SALK_024697C	Paired	151	5'UTR	AT1G13710	-	-	-
hdc1	SALK_043645	Paired	79	Intron	AT5G08450	TDNA-Chr5:2728174	AT5G08450	-
hda19-3	SALK_139445	Paired	79	Exon	AT4G38130	TDNA-Chr4:17898725	AT4G38130	Same control data with hdc1
atx3-1 atx4-1	GK-128H01 SALK_060156	Paired	101	Exon Intron	AT3G61740 AT4G27910	-	-	-
brm-1 ref6-1	SALK_030046 SALK_001018	Paired	101	5'UTR Exon	AT2G46020 AT3G48430	TDNA-Chr2:832030 Chr2:18923325-TDNA	AT2G02860 AT2G46020	-
smxl4-1 smxl5-1	SALK_037136 SALK_018522	Single	50	Exon Exon	AT4G29920 AT5G57130	-	-	-
smax1-2	SALK_128579	Single	50	Exon	AT5G57710	-	-	Same control data with smxl4-1 smxl5-1
wrky33	GABI_324B11	Single	100	Intron	AT2G38470	-	-	-
ros1-4	SALK_045303	Paired	101	Exon	AT2G36490	TDNA-Chr2:15308779	AT2G36490	-
swn-21	GABI_783A01	Paired	151	Exon	AT4G02020	Chr4:887629-TDNA TDNA-Chr4:887621	AT4G02020	-
swn-4	SALK_109121	Paired	150	Exon	AT4G02020	TDNA-Chr4:211284 Chr4:888601-TDNA Chr4:6084433-TDNA	AT4G00450/AT4G00460 AT4G02020 AT4G09630	-
Note: The previously annotated TISs and their overlapping genes are highlighted

## Sheet: Table S3
Supplementary Table S3. Summary of the T-DNAreader results from the RNA-seq datasets of the transgenic overexpression lines.
Transgenic plant	Backbone vector	Layout	Read length	Gene name	AGI number	TISs identified by T-DNAreader	Identified genes containing TISs	Note
GmNTL4-OX	pEGAD	Single	150	GmNTL		Chr4:18352894-TDNA TDNA-Chr4:18353116	AT4G39420 AT4G39420
GBPL3-OX	pCAMBIA1305	Paired	150	GBPL3	AT5G46070	-	-
ROT4-OX	pCAMBIA 35S-GFP	Paired	150	ROT4	AT2G36985	Chr2:13965646-TDNA Chr2:18317303-TDNA	- AT2G44350	pCAMBIA-GFP sequence
HaFT-OX	pCAMBIA3301	Paired	150	HaFT		Chr3:15598834-TDNA TDNA-Chr3:15598781	- -
VdSSR1-OX	pCAMBIA1300	Paired	151	VdSSR1		Chr3:17333004-TDNA TDNA-Chr3:17333020 Chr4:8430701-TDNA TDNA-Chr5:17242776	AT3G47060 AT3G47060 AT4G14716 AT5G42980
KLU-OX1	pK7FWG2	Paired	151	KLU	AT1G13710	-	-
KLU-OX2	pK7FWG2	Paired	151	KLU	AT1G13710	-	-
ZAT18-OX	pCAMBIA1305	Paired	150	ZAT18	AT3G53600	-	-
SLIM1-OX1	pH7WG2	Paired	150	SLIM1	AT1G73730	-	-
SLIM1-OX2	pH7WG2	Paired	150	SLIM1	AT1G73730	Chr5:18386701-TDNA	AT5G45360
GhAPR2-OX	pGWB2	Paired	150	GhAPR2		Chr3:71206-TDNA	AT3G01200,AT3G01202

## Sheet: Table S4
Supplementary Table S4. Summary of the TDNAscan results from the paired-end RNA-seq datasets of the T-DNA insertion mutants.
Mutant name	SRA number	T-DNA stock name	Layout	Read length	Genomic location	AGI number	TISs identified by TDNAscan	Identified genes containing TISs	Insertion frequency
floe1-1	SRR13765632	SALK_048257C	Paired	150	Exon	AT4G28300	Chr4:14016004	A4G28300	1
floe1-1	SRR13765633	SALK_048257C	Paired	150	Exon	AT4G28300	Chr4:14016004	A4G28300	1
floe1-1	SRR13765634	SALK_048257C	Paired	150	Exon	AT4G28300	Chr4:14016004	A4G28300	1
fio1-2	SRR14214604	SALK_209355	Paired	150	5'UTR	AT2G21070	-	-	-
fio1-2	SRR14214605	SALK_209355	Paired	150	5'UTR	AT2G21070	-	-	-
swo1-2	SRR14765661	SALK_201050C	Paired	150	Exon	AT4G17330	Chr4:9696812	AT4G17330	0.85
swo1-2	SRR14765662	SALK_201050C	Paired	150	Exon	AT4G17330	Chr4:9696812	AT4G17330	0.73
plt1-21 plt2-21	SRR14850977	SALK_116254 GK-297D04-015553	Paired	151	Exon Exon	AT3G20840 AT1G51190	Chr1:18979308 Chr2:8260815 Chr2:12696393 Chr3:7301573 Chr3:7301971 Chr3:7302677	AT1G51190 AT2G19070 AT2G29690 AT3G20840 AT3G20840 AT3G20840	0.52 1.0 0.08 0.13 0.97 0.64
plt1-21 plt2-21	SRR14850978	SALK_116254 GK-297D04-015553	Paired	151	Exon Exon	AT3G20840 AT1G51190	Chr1:18979308 Chr1:18979546 Chr1:27227526 Chr3:7302277 Chr3:7302677	AT1G51190 AT1G51190 AT1G72310 AT3G20840 AT3G20840	0.97 1 0.33 0.82 1
rve5-2	SRR15192949	GK_225C06	Paired	139	Exon	AT4G01280	Chr1:5858432 Chr1:21043891 Chr1:23786317 Chr3:2923416 Chr4:535550 Chr4:9587748 Chr4:10495155 Chr4:18380398 Chr5:1358079 Chr5:22247033 Chr5:24432439 Chr5:24914420 Chr5:24914592	AT1G17140 AT1G56220 AT1G64080 - AT4G01280 AT4G17040 AT4G19190 AT4G39540 AT5G04710 AT5G54770 AT5G60750 AT5G62000 AT5G62000	0.12 0.32 0.33 1 1 1 0.12 0.21 0.09 1 1 1 0.75
rve5-2	SRR15192950	GK_225C06	Paired	139	Exon	AT4G01280	Chr1:8422364 Chr1:8422535 Chr1:25493940 Chr1:26965588 Chr1:29576942 Chr2:650020 Chr2:2172876 Chr2:11916624 Chr2:13141937 Chr2:17351017 Chr3:196356 Chr3:300879 Chr3:2923416 Chr3:8670558 Chr3:18425661 Chr4:535550 Chr4:2522085 Chr4:15323605 Chr5:641835 Chr5:3713460 Chr5:4196825 Chr5:14764006 Chr5:16426221 Chr5:17616187 Chr5:25572030	AT1G23820 AT1G23820 AT1G68010 AT1G71695 AT1G78630 AT2G02450 AT2G05755 AT2G27980 AT2G30870 AT2G41620 AT3G01500 AT3G01850 - AT3G23990 AT3G49680 AT4G01280 AT4G04955 AT4G31620 AT5G02810 AT5G11560 AT5G13180 AT5G37290 AT5G41020 AT5G43810 AT5G63910	1 1 0.6 0.2 0.14 0.15 0.2 0.83 0.05 0.11 0.16 0.5 1 0.06 0.16 1 1 1 0.23 0.15 0.24 0.12 0.07 0.07 0.14
rve5-2	SRR15192951	GK_225C06	Paired	139	Exon	AT4G01280	Chr1:313272 Chr1:832356 Chr1:2877091 Chr1:5295316 Chr1:9719998 Chr1:10473022 Chr1:10478036 Chr1:11214924 Chr1:11215137 Chr1:18100628 Chr1:22027997 Chr1:22028174 Chr1:28808323 Chr1:30226674 Chr2:7967876 Chr2:8584053 Chr2:9563503 Chr3:2527547 Chr3:2841056 Chr3:2923416 Chr3:3399765 Chr3:5979858 Chr3:6548950 Chr3:8064230 Chr3:19077912 Chr3:19836269 Chr4:535488 Chr4:1130211 Chr4:7338845 Chr4:11616498 …	AT1G01910 AT1G03370 AT1G08930 AT1G15390 AT1G27900 AT1G29910 AT1G29930 AT1G31330 AT1G31330 AT1G48920 AT1G59840 AT1G59840 AT1G76740 AT1G80400 AT2G18330 AT2G19880 AT2G22500 AT3G07930 AT3G09260 - AT3G10860 AT3G17470 AT3G18990 AT3G22800 AT3G51390,AT3G51400 AT3G53500 AT4G01280 AT4G02570 AT4G12400 AT4G21900 AT5G10840 AT5G15270 AT5G17630 AT5G19510 AT5G38410 AT5G38410 AT5G42480 AT5G42480 AT5G49550 AT5G577…	0.19 0.14 0.06 1 0.28 1 1 1 1 0.75 1 1 1 0.14 0.6 1 0.07 0.08 0.09 1 0.36 1 0.16 0.12 0.06 0.08 0.63 1 0.07 0.22 0.14 0.05 0.12 0.27 1 1 1 1 0.08 0.14 0.06 0.38
scl30a-1	SRR15296036	SALK_041849	Paired	125	Exon	AT3G13570	Chr3:4431456	AT3G13570	0.8
scl30a-1	SRR15296037	SALK_041849	Paired	125	Exon	AT3G13570	Chr3:4431456	AT3G13570	1
scl30a-1	SRR15296038	SALK_041849	Paired	125	Exon	AT3G13570	Chr3:4431456	AT3G13570	0.67
atxr5-1 atxr6-1 tsk-4	SRR16047732	SALK_130607 SAIL_240_H01 SALK_034207	Paired	151	Exon 5'UTR Exon	AT5G09790 AT5G24330 AT3G18730	-	-	-
atxr5-1 atxr6-1 tsk-4	SRR16047735	SALK_130607 SAIL_240_H01 SALK_034207	Paired	151	Exon 5'UTR Exon	AT5G09790 AT5G24330 AT3G18730	-	-	-
bzip17-1	SRR16117203	SALK_104326	Paired	139	Exon	AT2G40950	Chr2:17089643	AT2G40950	1
bzip17-1	SRR16117204	SALK_104326	Paired	139	Exon	AT2G40950	Chr2:17089643	AT2G40950	1
bzip17-1	SRR16117205	SALK_104326	Paired	139	Exon	AT2G40950	Chr2:17089643	AT2G40950	1
val1-2 val2-1 pkl1-6	SRR16490693	SALK_088606 SALK_059568 SALK_033554	Paired	150	Exon Intron Intron	AT2G30470 AT4G32010 AT2G25170	Chr2:10722012 Chr2:12982820 Chr2:12982978 Chr2:12983155	AT2G25170 AT2G30470 AT2G30470 AT2G30470	0.72 1 1 1
val1-2 val2-1 pkl1-6	SRR16490694	SALK_088606 SALK_059568 SALK_033554	Paired	150	Exon Intron Intron	AT2G30470 AT4G32010 AT2G25170	Chr2:10722012 Chr2:12982820 Chr2:12982978	AT2G25170 AT2G30470 AT2G30470	0.5 1 1
val1-2 val2-1 pkl1-6	SRR16490695	SALK_088606 SALK_059568 SALK_033554	Paired	150	Exon Intron Intron	AT2G30470 AT4G32010 AT2G25170	Chr2:10722012 Chr2:12982820 Chr2:12982978 Chr4:15483530	AT2G25170 AT2G30470 AT2G30470 AT4G32010	0.75 1 1 1
jmj28-2	SRR16770639	SALK_019427	Paired	151	Exon	AT4G21430	Chr3:9066958 Chr4:11409647	AT3G24840 AT4G21430	0.17 1
jmj28-2	SRR16770641	SALK_019427	Paired	151	Exon	AT4G21430	Chr1:6916140 Chr3:4201335 Chr4:11409647 Chr5:25426891	AT1G19920 AT3G13080 AT4G21430 AT5G63520	0.21 0.27 1 0.13
ada2a-3	SRR18534097	SALK_150349	Paired	150	Exon	AT3G07740	-	-	-
ada2a-3	SRR18534098	SALK_150349	Paired	150	Exon	AT3G07740	-	-	-
ada2a-3	SRR18534099	SALK_150349	Paired	150	Exon	AT3G07740	-	-	-
ada2b	SRR18534094	SALK_009793	Paired	150	5'UTR	AT4G16420	-	-	-
ada2b	SRR18534095	SALK_009793	Paired	150	5'UTR	AT4G16420	-	-	-
ada2b	SRR18534096	SALK_009793	Paired	150	5'UTR	AT4G16420	Chr4:9263083	AT4G16420	1
hag1-2	SRR18534091	SALK_030913C	Paired	150	Exon	AT3G54610	Chr3:20217080 Chr3:20217223	AT3G54610 AT3G54610	1 1
hag1-2	SRR18534092	SALK_030913C	Paired	150	Exon	AT3G54610	Chr3:20216969 Chr3:20217223	AT3G54610 AT3G54610	1 1
hag1-2	SRR18534093	SALK_030913C	Paired	150	Exon	AT3G54610	Chr3:20217080 Chr3:20217223	AT3G54610 AT3G54610	1 1
ing1	SRR18534088	SALK_009598C	Paired	150	intron	AT3G24010	Chr3:8677124	AT3G24010	1
ing1	SRR18534089	SALK_009598C	Paired	150	intron	AT3G24010	Chr3:8677124	AT3G24010	1
ing1	SRR18534090	SALK_009598C	Paired	150	intron	AT3G24010	Chr3:8677124	AT3G24010	1
spc	SRR18534085	SALK_147258	Paired	150	intron	AT1G77800	Chr1:29256795	AT1G77800	1
spc	SRR18534086	SALK_147258	Paired	150	intron	AT1G77800	Chr1:29256795 Chr1:29256838	AT1G77800 AT1G77800	1 1
spc	SRR18534087	SALK_147258	Paired	150	intron	AT1G77800	Chr1:29256795	AT1G77800	1
eaf6	SRR18534082	SALK_026622	Paired	150	3'UTR	AT4G14385	Chr4:8288079	AT4G14385	0.56
eaf6	SRR18534083	SALK_026622	Paired	150	3'UTR	AT4G14385	Chr4:8288079	AT4G14385	0.21
eaf6	SRR18534084	SALK_026622	Paired	150	3'UTR	AT4G14385	-	-	-
sdrl	SRR18534079	SALK_125505	Paired	150	Exon	AT1G10310	Chr1:3383790	AT1G10310	1
sdrl	SRR18534080	SALK_125505	Paired	150	Exon	AT1G10310	Chr1:3383790 Chr1:17806194	AT1G10310 AT1G48230	1 0.07
sdrl	SRR18534081	SALK_125505	Paired	150	Exon	AT1G10310	Chr1:3383790	AT1G10310	0.38
nlp7-1	SRR18441634	SALK_026134	Paired	150	Exon	AT4G24020	Chr1:9573728 Chr4:12481128	AT1TE30840 AT4G24020	1 0.24
nlp7-1	SRR18441635	SALK_026134	Paired	150	Exon	AT4G24020	Chr4:12481128	AT4G24020	0.2
nlp7-1	SRR18441636	SALK_026134	Paired	150	Exon	AT4G24020	Chr1:9573728 Chr4:12480944 Chr4:12481128 Chr4:12481135	AT1TE30840 AT4G24020 AT4G24020 AT4G24020	1 1 1 1
aar2-2	SRR19019337	SALK_117746	Paired	150	Intron	AT1G66510	Chr1:24813810	AT1G66510	1
aar2-2	SRR19019338	SALK_117746	Paired	150	Intron	AT1G66510	-	-	-
aar2-2	SRR19019339	SALK_117746	Paired	150	Intron	AT1G66510	Chr1:24813810	AT1G66510	1
bcl7a-1 bcl7b-1	SRR21851398	SALK_027934 SALK_029285	Paired	150	Exon Exon	AT4G22320 AT5G55210	-	-	-
bcl7a-1 bcl7b-1	SRR21851399	SALK_027934 SALK_029285	Paired	150	Exon Exon	AT4G22320 AT5G55210	Chr3:20920857	AT3G56410	0.3
bcl7a-1 bcl7b-1	SRR21851400	SALK_027934 SALK_029285	Paired	150	Exon Exon	AT4G22320 AT5G55210	Chr3:20920857	AT3G56410	0.3
brm-1	SRR21851392	SALK_030046	Paired	150	5'UTR	AT2G46020	Chr2:18923326	AT2G46020	1
brm-1	SRR21851393	SALK_030046	Paired	150	5'UTR	AT2G46020	Chr2:12160432	AT2G28430	0.31
brm-1	SRR21851394	SALK_030046	Paired	150	5'UTR	AT2G46020	Chr2:18923326	AT2G46020	1
brm-3	SRR21851395	SALK_088462	Paired	150	Exon	AT2G46020	Chr2:18930117	AT2G46020	0.5
brm-3	SRR21851396	SALK_088462	Paired	150	Exon	AT2G46020	Chr2:18930117	AT2G46020	0.35
brm-3	SRR21851397	SALK_088462	Paired	150	Exon	AT2G46020	Chr2:18930117	AT2G46020	0.82
atchz1a-1 atchz1b-1	SRR21906845	GK_413F08	Paired	150	Exon Intron	AT4G08310 AT1G44780	Chr4:5249221	AT4G08310	1
atchz1a-1 atchz1b-1	SRR21906846	GK_413F08	Paired	150	Exon Intron	AT4G08310 AT1G44780	Chr4:5249221	AT4G08310	1
atchz1a-1 atchz1b-1	SRR21906847	GK_413F08	Paired	150	Exon Intron	AT4G08310 AT1G44780	Chr1:16910627 Chr4:5249221	AT1G44780 AT4G08310	0.38 1
syd-5	SRR22423435	SALK_023209	Paired	150	Exon	AT2G28290	Chr2:12056293	AT2G28290	0.46
syd-5	SRR22423436	SALK_023209	Paired	150	Exon	AT2G28290	Chr2:12056293	AT2G28290	1
syd-5	SRR22423437	SALK_023209	Paired	150	Exon	AT2G28290	Chr2:12056293	AT2G28290	0.67
swi3d-1	SRR22423432	SALK_100310	Paired	150	Exon	AT4G34430	Chr2:18757162 Chr4:16462951	AT2G45530 AT4G34430	0.05 1
swi3d-1	SRR22423433	SALK_100310	Paired	150	Exon	AT4G34430	Chr3:146868 Chr4:16462951 Chr5:4039796 Chr5:9439337 Chr5:21663244	AT3G01380 AT4G34430 AT5G12440 AT5G26830 AT5G53400	0.3 1 1 1 1
swi3d-1	SRR22423434	SALK_100310	Paired	150	Exon	AT4G34430	Chr1:5159231 Chr4:16462951 Chr4:18238112 Chr5:4039796	AT1G14960 AT4G34430 AT4G39160 AT5G12440	1 1 1 1
aipp2-1	SRR12554212	SALK_057771	Paired	151	Exon	AT3G02890	-	-	-
aipp2-1	SRR12554213	SALK_057771	Paired	151	Exon	AT3G02890	Chr1:28725286 Chr3:643487	AT1G76550 AT3G02890	0.06 0.67
aipp3-1	SRR12554210	GK_058D11	Paired	151	Intron	AT4G11560	Chr4:7001646	AT4G11560	1
aipp3-1	SRR12554211	GK_058D11	Paired	151	Intron	AT4G11560	Chr4:7001646	AT4G11560	1
cpl2-2	SRR12554218	SALK_059753	Paired	151	Intron	AT5G01270	-	-	-
cpl2-2	SRR12554219	SALK_059753	Paired	151	Intron	AT5G01270	-	-	-
xpo4-2	SRR11300787	SALK_093159	Paired	150	Intron	AT3G04490	-	-	-
xpo4-2	SRR11300788	SALK_093159	Paired	150	Intron	AT3G04490	Chr3:1202362	AT3G04490	1
cmt3-11	SRR10990381	SALK_148381	Paired	150	Intron	AT1G69770	Chr1:26251335 Chr1:26251346 Chr1:26251410	AT1G69770 AT1G69770 AT1G69770	1 1 1
cmt3-11	SRR10990382	SALK_148381	Paired	150	Intron	AT1G69770	Chr1:26251335 Chr1:26251346 Chr1:26251410 Chr1:26251566	AT1G69770 AT1G69770 AT1G69770 AT1G69770	1 1 1 1
hac1-1	SRR9672855	SALK_080380	Paired	100	Exon	AT1G79000	-	-	-
hac1-1	SRR9672856	SALK_080380	Paired	100	Exon	AT1G79000	-	-	-
hac1-1	SRR9672857	SALK_080380	Paired	100	Exon	AT1G79000	-	-	-
hac1-2	SRR9672858	SALK_136314	Paired	100	Exon	AT1G79000	Chr1:29718877	AT1G79000	0.38
hac1-2	SRR9672859	SALK_136314	Paired	100	Exon	AT1G79000	-	-	-
hac1-2	SRR9672860	SALK_136314	Paired	100	Exon	AT1G79000	-	-	-
fry1-6 rdr1-1	SRR9610023	SALK_020882 SAIL_672_F11	Paired	150	Exon Exon	AT5G63980 AT1G14790	Chr3:21191620 Chr5:25610647 Chr5:25610971	AT3G57270 AT5G63980 AT5G63980	1 1 0.9
fry1-6 rdr1-1	SRR9610024	SALK_020882 SAIL_672_F11	Paired	150	Exon Exon	AT5G63980 AT1G14790	Chr3:21191620 Chr5:1543725 Chr5:2207651 Chr5:25610647 Chr5:25610971	AT3G57270 AT5G05190 AT5G07120 AT5G63980 AT5G63980	0.9 0.06 0.3 1 0.9
dxo1-1	SRR9273389	SALK_103157	Paired	150	Exon	AT4G17620	Chr4:9822744 Chr4:9823491	AT4G17620 AT4G17620	0.61 0.13
dxo1-1	SRR9273390	SALK_103157	Paired	150	Exon	AT4G17620	Chr4:9823041 Chr4:9823491	AT4G17620 AT4G17620	0.70 0.23
dxo1-1	SRR9273391	SALK_103157	Paired	150	Exon	AT4G17620	Chr4:9823041 Chr4:9823491 Chr4:9823798	AT4G17620 AT4G17620 AT4G17620	0.89 0.72 0.56
dxo1-2	SRR9273392	SALK_032903	Paired	150	Intron	AT4G17620	Chr4:9823291 Chr4:9823332	AT4G17620 AT4G17620	1 1
dxo1-2	SRR9273393	SALK_032903	Paired	150	Intron	AT4G17620	Chr4:9823291 Chr4:9823332	AT4G17620 AT4G17620	1 1
dxo1-2	SRR9273394	SALK_032903	Paired	150	Intron	AT4G17620	Chr4:9822744 Chr4:9823291 Chr4:9823332	AT4G17620 AT4G17620 AT4G17620	1 1 1
klu-1	SRR8759754	SALK_024697C	Paired	151	5'UTR	AT1G13710	-	-	-
klu-1	SRR8759755	SALK_024697C	Paired	151	5'UTR	AT1G13710	-	-	-
klu-1	SRR8759756	SALK_024697C	Paired	151	5'UTR	AT1G13710	-	-	-
hdc1	SRR8380416	SALK_043645	Paired	79	Intron	AT5G08450	Chr5:2728174	AT5G08450	1
hdc1	SRR8380417	SALK_043645	Paired	79	Intron	AT5G08450	Chr5:2728174 Chr5:2728423 Chr5:2728491	AT5G08450 AT5G08450 AT5G08450	1 1 1
hda19-3	SRR8380418	SALK_139445	Paired	79	Exon	AT4G38130	Chr4:17898728	AT4G38130	0.3
hda19-3	SRR8380419	SALK_139445	Paired	79	Exon	AT4G38130	Chr4:17898728	AT4G38130	0.4
atx3-1 atx4-1	SRR2927093	GK-128H01 SALK_060156	Paired	101	Exon Intron	AT3G61740 AT4G27910	Chr3:22851270 Chr4:13895502	AT3G61740 AT4G27910	1 1
atx3-1 atx4-1	SRR2927094	GK-128H01 SALK_060156	Paired	101	Exon Intron	AT3G61740 AT4G27910	Chr3:22851270 Chr4:13895502	AT3G61740 AT4G27910	1 1
brm-1 ref6-1	SRR2177554	SALK_030046 SALK_001018	Paired	101	5'UTR Exon	AT2G46020 AT3G48430	-	-	-
brm-1 ref6-1	SRR2177555	SALK_030046 SALK_001018	Paired	101	5'UTR Exon	AT2G46020 AT3G48430	-	-	-
brm-1 ref6-1	SRR2177556	SALK_030046 SALK_001018	Paired	101	5'UTR Exon	AT2G46020 AT3G48430	Chr2:832030	AT2G02860	0.75
ros1-4	SRR1761518	SALK_045303	Paired	101	Exon	AT2G36490	-	-	-
ros1-4	SRR1761519	SALK_045303	Paired	101	Exon	AT2G36490	-	-	-
ros1-4	SRR1761520	SALK_045303	Paired	101	Exon	AT2G36490	-	-	-
swn-21	SRR2500948	GABI_783A01	Paired	151	Exon	AT4G02020	-	-	-
swn-21	SRR2962412	GABI_783A01	Paired	151	Exon	AT4G02020	-	-	-
swn-4	SRR6453495	SALK_109121	Paired	150	Exon	AT4G02020	-	-	-
swn-4	SRR6453496	SALK_109121	Paired	150	Exon	AT4G02020	Chr4:211353 Chr4:888602	AT4G00460 AT4G02020	1 1
swn-4	SRR6453497	SALK_109121	Paired	150	Exon	AT4G02020	Chr4:888602	AT4G02020	1
Note: The previously annotated TISs and their overlapping genes are highlighted

## Sheet: Table S5
Supplementary Table S5. Summary of the T-LOC results from the paired-end RNA-seq datasets of the T-DNA insertion mutants.
Mutant name	SRA number	T-DNA stock name	Layout	Read length	Genomic location	AGI number	TISs identified by T-LOC (using BWA)	Identified genes containing TISs (using BWA)	TISs identified by T-LOC (using multiple control replicates)	Identified genes containing TISs (using multiple control replicates)	TISs identified by T-LOC (using a single control replicate)	Identified genes containing TISs (using a single control replicate)
floe1-1	SRR13765632	SALK_048257C	Paired	150	Exon	AT4G28300	Chr4:14016002 Chr4:14016003	AT4G28300	-	-	Chr4:14016003	A4G28300
floe1-1	SRR13765633	SALK_048257C	Paired	150	Exon	AT4G28300	Chr4:14016003	AT4G28300	-	-	Chr4:14016003	A4G28300
floe1-1	SRR13765634	SALK_048257C	Paired	150	Exon	AT4G28300	Chr1:26626909 Chr4:14016002 Chr4:14016003	AT1G70620 AT4G28300	-	-	Chr4:14016003	A4G28300
fio1-2	SRR14214604	SALK_209355	Paired	150	5'UTR	AT2G21070	-	-	-	-	-	-
fio1-2	SRR14214605	SALK_209355	Paired	150	5'UTR	AT2G21070	-	-	-	-	-	-
swo1-2	SRR14765661	SALK_201050C	Paired	150	Exon	AT4G17330	Chr4:9696812 Chr4:9696814	AT4G17330	-	-	Chr4:9696812	AT4G17330
swo1-2	SRR14765662	SALK_201050C	Paired	150	Exon	AT4G17330	Chr4:9696812 Chr4:9696814	AT4G17330	-	-	Chr4:9696812	AT4G17330
plt1-21 plt2-21	SRR14850977	SALK_116254 GK-297D04-015553	Paired	151	Exon Exon	AT3G20840 AT1G51190	Chr1:9890449 Chr1:18979275 Chr1:18979289 Chr1:18979291 Chr1:18979292 Chr1:18979306 Chr1:18979310 Chr1:18979545 Chr1:18979547 Chr1:18979579 Chr1:18979589 Chr3:7302675 Chr3:7302690 Chr5:1389799	AT1G28290 AT1G51190 AT3G20840 AT5G04800	Chr1:18979264 Chr1:18979277 Chr1:18979285 Chr1:18979289 Chr1:18979306 Chr1:18979547 Chr1:18979589 Chr3:7302669 Chr3:7302690	AT1G51190 AT3G20840	Chr1:18979264 Chr1:18979275 Chr1:18979277 Chr1:18979285 Chr1:18979289 Chr1:18979291 Chr1:18979306 Chr1:18979307 Chr1:18979547 Chr1:18979552 Chr1:18979576 Chr1:18979589 Chr3:7302669 Chr3:7302690	AT1G51190 AT3G20840
plt1-21 plt2-21	SRR14850978	SALK_116254 GK-297D04-015553	Paired	151	Exon Exon	AT3G20840 AT1G51190	Chr1:18979275 Chr1:18979289 Chr1:18979291 Chr1:18979302 Chr1:18979306 Chr1:18979545 Chr1:18979547 Chr1:18979579 Chr1:18979582 Chr1:18979589 Chr2:10438214 Chr3:7302675 Chr3:7302690 Chr3:15801072 Chr4:7349814	AT1G51190 AT2G24570 AT3G20840 AT3G44010 AT4G12420	Chr1:18979264 Chr1:18979277 Chr1:18979285 Chr1:18979289 Chr1:18979306 Chr1:18979547 Chr1:18979589 Chr3:7302669 Chr3:7302675 Chr3:7302690	AT1G51190 AT3G20840	Chr1:18979264 Chr1:18979275 Chr1:18979277 Chr1:18979285 Chr1:18979289 Chr1:18979291 Chr1:18979306 Chr1:18979307 Chr1:18979547 Chr1:18979552 Chr1:18979576 Chr1:18979589 Chr2:10438223 Chr3:7302669 Chr3:7302675 Chr3:7302690	AT1G51190 AT2G24570 AT3G20840
rve5-2	SRR15192949	GK_225C06	Paired	139	Exon	AT4G01280	Chr1:3018103 Chr1:24655639 Chr2:17891675 Chr3:2923416 Chr3:4362997 Chr3:5083947 Chr3:9527139 Chr3:9828533 Chr3:17400593 Chr3:17401460 Chr3:18566472 Chr3:19371327 Chr3:23045658 Chr4:535550 Chr4:6385905 Chr4:8055035 Chr4:9587747 Chr4:18380397 Chr5:1953438 Chr5:5018916 Chr5:6975968 Chr5:18382719 Chr5:20715662	AT1G09340 AT1G66200 AT2G43020 Chr3:2923416 (none) AT3G13410 AT3G15095 AT3G26070 AT3G26740 AT3G47250 AT3G50070 AT3G52230 AT3G62270 AT4G01280 AT4G10300 AT4G13940 AT4G17040 AT4G39540 AT5G06390 AT5G15460 AT5G20630 AT5G45350 AT5G50920	Chr1:3018103 Chr3:3324955 Chr4:8055035 Chr4:11646797 Chr5:6416052	AT1G09340 AT3G10640 AT4G13940 AT4G21960 AT5G19130	Chr1:3018103 Chr3:2923416 Chr3:3324955 Chr3:5468826 Chr3:17401473 Chr4:535550 Chr4:8055035 Chr4:11646797 Chr5:6416052	AT1G09340 Chr3:2923416 (none) AT3G10640 AT3G16140 AT3G47250 AT4G01280 AT4G13940 AT4G21960 AT5G19130
rve5-2	SRR15192950	GK_225C06	Paired	139	Exon	AT4G01280	Chr1:2077453 Chr1:4220226 Chr1:6944602 Chr1:11394152 Chr1:24228523 Chr1:27113819 Chr2:2026780 Chr2:9786428 Chr2:10063187 Chr2:13688877 Chr2:15636079 Chr2:16914648 Chr3:2923416 Chr3:4030164 Chr3:8920841 Chr3:9789516 Chr3:17305963 Chr3:20359098 Chr3:23037589 Chr4:535550 Chr4:536875 Chr4:12743245 Chr4:18165555 Chr5:1530548 Chr5:4035466 Chr5:6014497 Chr5:14067146 Chr5:14485229 Chr5:16807748 Chr5:1706…	AT1G06760 AT1G12390 AT1G20020 AT1G31780 AT1G65220 AT1G72040 AT2G05520 AT2G22990 AT2G23670,AT2G23672 AT2G32240 AT2G37220 AT2G40490 Chr3:2923416 (none) AT3G12685 AT3G24503 AT3G26618 AT3G46970 AT3G54950 AT3G62250 AT4G01280 AT4G24690 AT4G38970 AT5G05170 AT5G12440 AT5G18190 AT5G35930 AT5G36800 AT5G42020 AT5G42620 AT5G43810 AT5G52880 AT5G54430 AT5G66570	Chr1:4220226 Chr5:25749504	AT1G12390 AT5G64400	Chr1:4220226 Chr3:2923416 Chr3:8920841 Chr3:23132578 Chr4:535550 Chr4:7310856 Chr5:25749504	AT1G12390 Chr3:2923416 (none) AT3G24503 AT3G62530 AT4G01280 AT4G12310 AT5G64400
rve5-2	SRR15192951	GK_225C06	Paired	139	Exon	AT4G01280	Chr1:224169 Chr1:1201319 Chr1:1431554 Chr1:2094090 Chr1:2171762 Chr1:3017128 Chr1:4891513 Chr1:8200815 Chr1:9153026 Chr1:10640223 Chr1:10723083 Chr1:10858539 Chr1:11559032 Chr1:13051583 Chr1:20666444 Chr1:20867971 Chr1:23390310 Chr1:27991204 Chr1:28079728 Chr1:28372658 Chr2:917393 Chr2:4006106 Chr2:9637352 Chr2:10242109 Chr2:10567702 Chr2:14892195 Chr2:14961213 Chr2:17611141 Chr2:18788843 Chr2:19…	AT1G01610 AT1G04430 AT1G05010 AT1G06820 AT1G07080 AT1G09340 AT1G14330 AT1G23130 AT1G26460 AT1G30230 AT1G30380 AT1G30630 AT1G32130 AT1G35470 AT1G55360 AT1G55830 AT1G63080 AT1G74470 AT1G74730 AT1G75560 AT2G03090 AT2TE16945 AT2G22670 AT2G24090 AT2G24790 AT2G35370 AT2G35620 AT2G42270 AT2G45590 AT2G46470 AT3G01560 AT3G04120 Chr3:2923416 (none) AT3G08940 AT3G10340 AT3G10860 AT3G15690 AT3G16630 AT3G1803…	Chr1:638330 Chr1:2049250 Chr1:2049258 Chr1:20867971 Chr1:23234729 Chr1:23234736 Chr1:25048687 Chr2:9637352 Chr2:10242111 Chr3:4631533 Chr3:22600902 Chr4:38199	AT1G02870 AT1G06680 AT1G55830 AT1G62750 AT1G67090 AT2G22670 AT2G24090 AT3G14000 AT3G61050 AT4G00100	Chr1:638330 Chr1:2049250 Chr1:2049258 Chr1:20867971 Chr1:23234729 Chr1:23234736 Chr1:25048687 Chr2:8584053 Chr2:9265493 Chr2:9637352 Chr2:10242111 Chr3:2923416 Chr3:4631533 Chr3:20340878 Chr3:22600902 Chr4:38199 Chr5:24290595	AT1G02870 AT1G06680 AT1G55830 AT1G62750 AT1G67090 AT2G19880 AT2G21660 AT2G22670 AT2G24090 Chr3:2923416 (none) AT3G14000 AT3G54890 AT3G61050 AT4G00100 AT5G60390
scl30a-1	SRR15296036	SALK_041849	Paired	125	Exon	AT3G13570	Chr3:4431094 Chr3:4431112	AT3G13570	-	-	Chr3:4431094	AT3G13570
scl30a-1	SRR15296037	SALK_041849	Paired	125	Exon	AT3G13570	-	-	-	-	Chr3:4431094	AT3G13570
scl30a-1	SRR15296038	SALK_041849	Paired	125	Exon	AT3G13570	Chr3:4431094 Chr3:4431112	AT3G13570	-	-	Chr3:4431094	AT3G13570
atxr5-1 atxr6-1 tsk-4	SRR16047732	SALK_130607 SAIL_240_H01 SALK_034207	Paired	151	Exon 5'UTR Exon	AT5G09790 AT5G24330 AT3G18730	Chr1:20902064 Chr2:9055823 Chr4:12509904 Chr4:16323102 Chr5:8297144 Chr5:9277770	AT1G55890 AT2G21130 Chr4:12509904 (none) AT4G34070 AT5G24330 AT5G26667	Chr5:8297142 Chr5:9277776	AT5G24330 AT5G26667	Chr5:8297139 Chr5:8297142 Chr5:9277776	AT5G24330 AT5G26667
atxr5-1 atxr6-1 tsk-4	SRR16047735	SALK_130607 SAIL_240_H01 SALK_034207	Paired	151	Exon 5'UTR Exon	AT5G09790 AT5G24330 AT3G18730	-	-	Chr1:20450313	AT1G54820	Chr1:20450313 Chr5:8297139	AT1G54820 AT5G24330
bzip17-1	SRR16117203	SALK_104326	Paired	139	Exon	AT2G40950	Chr2:17089643 Chr2:17089646	AT2G40950	Chr2:17089646	AT2G40950	Chr2:17089643 Chr2:17089646	AT2G40950
bzip17-1	SRR16117204	SALK_104326	Paired	139	Exon	AT2G40950	Chr2:17089643 Chr2:17089646	AT2G40950	-	-	Chr2:17089643	AT2G40950
bzip17-1	SRR16117205	SALK_104326	Paired	139	Exon	AT2G40950	Chr2:17089643 Chr2:17089646	AT2G40950	-	-	-	-
val1-2 val2-1 pkl1-6	SRR16490693	SALK_088606 SALK_059568 SALK_033554	Paired	150	Exon Intron Intron	AT2G30470 AT4G32010 AT2G25170	Chr2:10722011 Chr2:10722138 Chr2:12982820 Chr2:12982981 Chr4:13612326 Chr4:15483521 Chr4:15483529	AT2G25170 AT2G30470 AT4G27160 AT4G32010	Chr2:10722008 Chr2:12982821 Chr2:12982986 Chr4:15483521	AT2G25170 AT2G30470 AT4G32010	Chr2:10722008 Chr2:12982820 Chr2:12982821 Chr2:12982986 Chr4:13612315 Chr4:15483521 Chr4:15483529	AT2G25170 AT2G30470 AT4G27160 AT4G32010
val1-2 val2-1 pkl1-6	SRR16490694	SALK_088606 SALK_059568 SALK_033554	Paired	150	Exon Intron Intron	AT2G30470 AT4G32010 AT2G25170	Chr2:10722011 Chr2:12982820 Chr2:12982821 Chr2:12982981 Chr3:3860641 Chr3:3860642 Chr3:8960668 Chr3:23195471 Chr3:23195487 Chr4:15483521 Chr4:15483529	AT2G25170 AT2G30470 AT3G12120 AT3G24550 AT3G62700 AT4G32010	-	-	Chr2:12982820 Chr4:15483529	AT2G30470 AT4G32010
val1-2 val2-1 pkl1-6	SRR16490695	SALK_088606 SALK_059568 SALK_033554	Paired	150	Exon Intron Intron	AT2G30470 AT4G32010 AT2G25170	Chr2:10722011 Chr2:10722115 Chr2:12982820 Chr2:12982821 Chr2:12982981 Chr4:15483521 Chr4:15483529	AT2G25170 AT2G30470 AT4G32010	Chr2:10722008 Chr2:12982835 Chr2:12982981 Chr2:12982986 Chr4:15483521	AT2G25170 AT2G30470 AT4G32010	Chr2:10722008 Chr2:12982820 Chr2:12982835 Chr2:12982958 Chr2:12982981 Chr2:12982986 Chr4:15483521 Chr4:15483529	AT2G25170 AT2G30470 AT4G32010
jmj28-2	SRR16770639	SALK_019427	Paired	151	Exon	AT4G21430	Chr1:1595422 Chr1:2438732 Chr1:10475563 Chr1:19891360 Chr1:20890553 Chr1:25469876 Chr1:28950638 Chr1:29551924 Chr1:30061573 Chr2:8517165 Chr2:8879216 Chr2:10911165 Chr2:13436633 Chr2:17493376 Chr3:1979246 Chr3:2904261 Chr3:4784962 Chr3:5505601 Chr3:5589245 Chr3:6328989 Chr3:6630694 Chr3:9066957 Chr3:14200437 Chr3:15239112 Chr3:18891831 Chr4:953479 Chr4:11384019 Chr4:11409647 Chr5:2760906 Chr5:776…	AT1G05430 AT1G07890 AT1G29920 AT1G53320 AT1G55860 AT1G67900 AT1G77030 AT1G78570 AT1G79920 AT2G19760 AT2G20610 AT2G25640 AT2G31560 AT2G41900 AT3G06450 AT3G09440 AT3G14350 AT3G16240 AT3G16450 AT3G18440 AT3G19170 AT3G24840 AT3G06365 AT3G43300 AT3G50820 AT4G02150 AT4G21370 AT4G21430 AT5G08530 AT5G23110	Chr2:11816924 Chr4:11384023	AT2G27710 AT4G21370	Chr1:10376803 Chr2:11816924 Chr3:2412635 Chr3:9066957 Chr4:11384000 Chr4:11384023 Chr4:11409647 Chr5:2760906	AT1G29670 AT2G27710 AT3G07560 AT3G24840 AT4G21370 AT4G21430 AT5G08530
jmj28-2	SRR16770641	SALK_019427	Paired	151	Exon	AT4G21430	Chr1:6282648 Chr1:18771375 Chr1:22585914 Chr2:18338446 Chr3:1356167 Chr3:5243551 Chr3:14229089 Chr3:19583913 Chr3:19991024 Chr3:20848354 Chr3:22304386 Chr4:2593859 Chr4:9118963 Chr4:11384019 Chr4:11409647 Chr4:13346046 Chr4:15453351 Chr5:1544269 Chr5:18971220 Chr5:20052180 Chr5:22683815 Chr5:24828476 Chr5:25361851 Chr5:25409274	AT1G18265 AT1G50659,AT1G50660 AT1G61250 AT2G44440 AT3G04910 AT3G15510 AT3G42050 AT3G52840 AT3G53990 AT3G56190 AT3G60340 AT4G05070 AT4G16120 AT4G21370 AT4G21430 AT4G26400 AT4G31940 AT5G05200 AT5G46750 AT5G49450 AT5G56010 AT5G61790 AT5G63260 AT5G63450	Chr2:17269755 Chr3:19583913 Chr4:11384023 Chr4:11409647 Chr5:17098915	AT2G41430 AT3G52840 AT4G21370 AT4G21430 AT5G42650	Chr2:17269755 Chr3:5892081 Chr3:19583913 Chr4:11384000 Chr4:11384023 Chr4:11409647 Chr5:17098915 Chr5:18971220	AT2G41430 AT3G17240 AT3G52840 AT4G21370 AT4G21430 AT5G42650 AT5G46750
ada2a-3	SRR18534097	SALK_150349	Paired	150	Exon	AT3G07740	-	-	-	-	Chr2:17334149	AT2G41560
ada2a-3	SRR18534098	SALK_150349	Paired	150	Exon	AT3G07740	-	-	-	-	-	-
ada2a-3	SRR18534099	SALK_150349	Paired	150	Exon	AT3G07740	-	-	-	-	-	-
ada2b	SRR18534094	SALK_009793	Paired	150	5'UTR	AT4G16420	-	-	-	-	Chr1:18217325 Chr3:8589656 Chr4:9262973 Chr4:9263083 Chr5:4196582	AT1G49240 AT3G23810 AT4G16420 AT5G13180
ada2b	SRR18534095	SALK_009793	Paired	150	5'UTR	AT4G16420	Chr3:22455185	AT3G60750	-	-	Chr4:9262973	AT4G16420
ada2b	SRR18534096	SALK_009793	Paired	150	5'UTR	AT4G16420	Chr1:733422	AT1G03080	-	-	Chr1:733425 Chr4:9262973 Chr4:9263083	AT1G03080 AT4G16420
hag1-2	SRR18534091	SALK_030913C	Paired	150	Exon	AT3G54610	Chr3:20217222	AT3G54610	-	-	Chr3:20217222	AT3G54610
hag1-2	SRR18534092	SALK_030913C	Paired	150	Exon	AT3G54610	Chr3:20217222	AT3G54610	-	-	Chr3:20217222	AT3G54610
hag1-2	SRR18534093	SALK_030913C	Paired	150	Exon	AT3G54610	Chr3:20217222	AT3G54610	-	-	Chr3:20217222	AT3G54610
ing1	SRR18534088	SALK_009598C	Paired	150	intron	AT3G24010	Chr3:8677112 Chr3:8677124	AT3G24010	-	-	Chr1:6698441	AT1G19380
ing1	SRR18534089	SALK_009598C	Paired	150	intron	AT3G24010	Chr3:8677092 Chr3:8677112 Chr3:8677124	AT3G24010	-	-	Chr2:11546578 Chr3:8677112	AT2G27050 AT3G24010
ing1	SRR18534090	SALK_009598C	Paired	150	intron	AT3G24010	Chr3:8677092 Chr3:8677112 Chr3:8677124 Chr3:8747459 Chr5:2061788	AT3G24010 AT3G24190 AT5G06690	-	-	Chr3:8677110 Chr5:2061788	AT3G24010 AT5G06690
spc	SRR18534085	SALK_147258	Paired	150	intron	AT1G77800	Chr1:29256794	AT1G77800	-	-	Chr1:5514589	AT1G16080
spc	SRR18534086	SALK_147258	Paired	150	intron	AT1G77800	Chr1:29256794 Chr1:29256838 Chr3:5750327	AT1G77800 AT3G16850	-	-	Chr2:9155076	AT2G21390
spc	SRR18534087	SALK_147258	Paired	150	intron	AT1G77800	-	-	-	-	Chr1:25395039	AT1G67740
eaf6	SRR18534082	SALK_026622	Paired	150	3'UTR	AT4G14385	-	-	-	-	Chr3:19465947	AT3G52500
eaf6	SRR18534083	SALK_026622	Paired	150	3'UTR	AT4G14385	Chr4:8288079	AT4G14385	-	-	Chr1:25048590	AT1G67090
eaf6	SRR18534084	SALK_026622	Paired	150	3'UTR	AT4G14385	-	-	-	-	-	-
sdrl	SRR18534079	SALK_125505	Paired	150	Exon	AT1G10310	Chr1:3383790	AT1G10310	Chr1:3383791	AT1G10310	Chr1:3383787 Chr1:3383791	AT1G10310
sdrl	SRR18534080	SALK_125505	Paired	150	Exon	AT1G10310	Chr1:3383790 Chr1:17806194 Chr1:28034498 Chr4:8055505	AT1G10310 AT1G48230 AT1G74640 AT4G13940	Chr1:3383791	AT1G10310	Chr1:3383791 Chr1:6691570	AT1G10310 AT1G19360
sdrl	SRR18534081	SALK_125505	Paired	150	Exon	AT1G10310	Chr1:3383790 Chr3:17494833	AT1G10310 AT3G47470	-	-	Chr4:1229743	AT4G02770
nlp7-1	SRR18441634	SALK_026134	Paired	150	Exon	AT4G24020	Chr1:7272347 Chr1:7272354 Chr1:9573728 Chr4:12480941 Chr4:12481127 Chr4:12481133 Chr4:12481134 Chr4:12481171 Chr4:12481177	Chr1:7272347,7272354 (none) AT1TE30840 AT4G24020	Chr1:7272354 Chr4:12481177	Chr1:7272354 (none) AT4G24020	Chr1:7272347 Chr1:7272354 Chr1:9573728 Chr4:12481127 Chr4:12481171 Chr4:12481177	Chr1:7272347,7272354 (none) AT1TE30840 AT4G24020
nlp7-1	SRR18441635	SALK_026134	Paired	150	Exon	AT4G24020	Chr1:7272347 Chr1:7272354 Chr1:9573728 Chr4:12480941 Chr4:12480943 Chr4:12481127 Chr4:12481133 Chr4:12481134 Chr4:12481171 Chr4:12481177	Chr1:7272347,7272354 (none)AT1TE30840 AT4G24020	Chr1:7272354 Chr4:12481122 Chr4:12481177	Chr1:7272354 (none) AT4G24020	Chr1:7272354 Chr4:12480943 Chr4:12481122 Chr4:12481127 Chr4:12481171 Chr4:12481177	Chr1:7272354 (none) AT4G24020
nlp7-1	SRR18441636	SALK_026134	Paired	150	Exon	AT4G24020	Chr1:7272347 Chr1:7272354 Chr1:9573728 Chr4:12480941 Chr4:12480943 Chr4:12481127 Chr4:12481171 Chr4:12481177	Chr1:7272347,7272354 (none)AT1TE30840 AT4G24020	Chr1:7272354 Chr1:9573730 Chr4:12480941 Chr4:12481122 Chr4:12481177	Chr1:7272354 (none) AT1TE30840 AT4G24020	Chr1:7272354 Chr1:9573730 Chr4:12480941 Chr4:12481122 Chr4:12481127 Chr4:12481171 Chr4:12481177	Chr1:7272354 (none) AT1TE30840 AT4G24020
aar2-2	SRR19019337	SALK_117746	Paired	150	Intron	AT1G66510	Chr1:24813772 Chr1:24813774 Chr1:24813815 Chr4:7760298	AT1G66510 AT4G13340	Chr1:24813772 Chr4:7760307	AT1G66510 AT4G13340	Chr1:24813772 Chr4:7760307	AT1G66510 AT4G13340
aar2-2	SRR19019338	SALK_117746	Paired	150	Intron	AT1G66510	Chr1:24813772 Chr1:24813810 Chr1:24813815	AT1G66510 AT4G13340	-	-	-	-
aar2-2	SRR19019339	SALK_117746	Paired	150	Intron	AT1G66510	Chr1:2641720 Chr1:24813810 Chr1:24813815	AT1G08380 AT1G66510	Chr1:2641720 Chr1:24813815	AT1G08380 AT1G66510	Chr1:2641720 Chr1:24813810 Chr1:24813815	AT1G08380 AT1G66510
bcl7a-1 bcl7b-1	SRR21851398	SALK_027934 SALK_029285	Paired	150	Exon Exon	AT4G22320 AT5G55210	-	-	-	-	-	-
bcl7a-1 bcl7b-1	SRR21851399	SALK_027934 SALK_029285	Paired	150	Exon Exon	AT4G22320 AT5G55210	-	-	-	-	-	-
bcl7a-1 bcl7b-1	SRR21851400	SALK_027934 SALK_029285	Paired	150	Exon Exon	AT4G22320 AT5G55210	-	-	-	-	-	-
brm-1	SRR21851392	SALK_030046	Paired	150	5'UTR	AT2G46020	Chr2:18923324 Chr2:18923325	AT2G46020	-	-	-	-
brm-1	SRR21851393	SALK_030046	Paired	150	5'UTR	AT2G46020	Chr2:12160432	AT2G28430	-	-	-	-
brm-1	SRR21851394	SALK_030046	Paired	150	5'UTR	AT2G46020	Chr2:18923324 Chr2:18923325	AT2G46020	-	-	-	-
brm-3	SRR21851395	SALK_088462	Paired	150	Exon	AT2G46020	Chr2:18930115 Chr2:18930162	AT2G46020	-	-	Chr2:18930116	AT2G46020
brm-3	SRR21851396	SALK_088462	Paired	150	Exon	AT2G46020	Chr2:18930115 Chr2:18930116 Chr2:18930162	AT2G46020	-	-	Chr2:18930116	AT2G46020
brm-3	SRR21851397	SALK_088462	Paired	150	Exon	AT2G46020	Chr2:18930115 Chr2:18930116	AT2G46020	-	-	Chr2:18930116	AT2G46020
atchz1a-1 atchz1b-1	SRR21906845	GK_413F08	Paired	150	Exon Intron	AT4G08310 AT1G44780	Chr1:16910629 Chr4:5249221 Chr4:5249223	AT1G44780 AT4G08310	Chr4:5249221	AT4G08310	Chr1:16910627 Chr4:5249221	AT1G44780 AT4G08310
atchz1a-1 atchz1b-1	SRR21906846	GK_413F08	Paired	150	Exon Intron	AT4G08310 AT1G44780	Chr4:5249221 Chr4:5249223	AT4G08310	-	-	Chr4:5249221	AT4G08310
atchz1a-1 atchz1b-1	SRR21906847	GK_413F08	Paired	150	Exon Intron	AT4G08310 AT1G44780	Chr1:16910561 Chr1:16910565 Chr1:16910627 Chr1:16910629 Chr4:5249221 Chr4:5249223	AT1G44780 AT4G08310	Chr4:5249221	AT4G08310	Chr1:16910627 Chr4:5249221	AT1G44780 AT4G08310
syd-5	SRR22423435	SALK_023209	Paired	150	Exon	AT2G28290	Chr2:12056292	AT2G28290	-	-	-	-
syd-5	SRR22423436	SALK_023209	Paired	150	Exon	AT2G28290	Chr2:12056292	AT2G28290	Chr2:12056292	AT2G28290	Chr2:12056292	AT2G28290
syd-5	SRR22423437	SALK_023209	Paired	150	Exon	AT2G28290	Chr2:12056292	AT2G28290	-	-	-	-
swi3d-1	SRR22423432	SALK_100310	Paired	150	Exon	AT4G34430	Chr3:5516247 Chr3:18420741 Chr4:16462950 Chr4:16471886 Chr5:4039795	AT3G16270 AT3G49670 AT4G34430 AT4G34450 AT5G12440	Chr4:16462949	AT4G34430	Chr4:16462949 Chr4:16462950	AT4G34430
swi3d-1	SRR22423433	SALK_100310	Paired	150	Exon	AT4G34430	Chr1:3054422 Chr1:3054425 Chr1:4839874 Chr1:4839876 Chr1:10478804 Chr1:15652417 Chr1:15652418 Chr1:17867394 Chr1:25049183 Chr1:25973051 Chr1:27054531 Chr1:27054532 Chr1:29572166 Chr2:15263255 Chr2:16475622 Chr2:18207777 Chr2:18207778 Chr3:3091434 Chr3:3091436 Chr3:8473842 Chr3:8473843 Chr4:16462949 Chr4:16462950 Chr5:4039793 Chr5:4039795 Chr5:4131351 Chr5:16087024 Chr5:16087025 Chr5:18723455 Chr5…	AT1G09460 AT1G14150 AT1G29930 AT1G41880 AT1G48350 AT1G67090 AT1G69080 AT1G71880 AT1G78610 AT2G36380 AT2G39460 AT2G43970 AT3G10020 AT3G23600 AT4G34430 AT5G12440 AT5G13020 AT5G40250 AT5G46190 AT5G52780 AT5G53400 AT5G62840	-	-	Chr4:16462950 Chr5:4039795	AT4G34430 AT5G12440
swi3d-1	SRR22423434	SALK_100310	Paired	150	Exon	AT4G34430	Chr1:4201220 Chr1:5159231 Chr2:13492429 Chr3:6867653 Chr4:16462949 Chr4:16462950 Chr5:506737 Chr5:4039793 Chr5:4039795 Chr5:15381394	AT1G12360 AT1G14960 AT2G31740 AT3G19770 AT4G34430 AT5G02380 AT5G12440 AT5G38420	-	-	Chr4:16462950	AT4G34430
aipp2-1	SRR12554212	SALK_057771	Paired	151	Exon	AT3G02890	Chr2:11113694 Chr3:20636133 Chr3:22294106 Chr3:23037576 Chr4:16945385	AT2G26080 AT3G55620 AT3G60320 AT3G62250 AT4G35770	-	-	-	-
aipp2-1	SRR12554213	SALK_057771	Paired	151	Exon	AT3G02890	Chr2:17946726 Chr3:643486 Chr3:22679114	AT2G43150 AT3G02890 AT3G61270	Chr1:5447088	AT1G15820	Chr1:5447088 Chr3:643486	AT1G15820 AT3G02890
aipp3-1	SRR12554210	GK_058D11	Paired	151	Intron	AT4G11560	Chr4:7001644 Chr4:7001646	AT4G11560	Chr4:7001644	AT4G11560	Chr4:7001643 Chr4:7001644	AT4G11560
aipp3-1	SRR12554211	GK_058D11	Paired	151	Intron	AT4G11560	Chr4:7001646	AT4G11560	-	-	Chr4:7001643	AT4G11560
cpl2-2	SRR12554218	SALK_059753	Paired	151	Intron	AT5G01270	Chr2:96523 Chr5:109312	AT2G01140 AT5G01270	-	-	Chr5:109309	AT5G01270
cpl2-2	SRR12554219	SALK_059753	Paired	151	Intron	AT5G01270	Chr5:109312	AT5G01270	-	-	Chr5:109309	AT5G01270
xpo4-2	SRR11300787	SALK_093159	Paired	150	Intron	AT3G04490	-	-	-	-	-	-
xpo4-2	SRR11300788	SALK_093159	Paired	150	Intron	AT3G04490	-	-	-	-	-	-
cmt3-11	SRR10990381	SALK_148381	Paired	150	Intron	AT1G69770	Chr1:26251329 Chr1:26251340	AT1G69770	-	-	-	-
cmt3-11	SRR10990382	SALK_148381	Paired	150	Intron	AT1G69770	Chr1:26251329 Chr1:26251341 Chr3:9537441	AT1G69770 AT3G26100	-	-	-	-
hac1-1	SRR9672855	SALK_080380	Paired	100	Exon	AT1G79000	Chr3:21262254 Chr3:21262259	AT3G57450	-	-	Chr3:21262245	AT3G57450
hac1-1	SRR9672856	SALK_080380	Paired	100	Exon	AT1G79000	-	-	-	-	-	-
hac1-1	SRR9672857	SALK_080380	Paired	100	Exon	AT1G79000	-	-	-	-	-	-
hac1-2	SRR9672858	SALK_136314	Paired	100	Exon	AT1G79000	Chr1:29718847 Chr1:29718849 Chr1:29718877 Chr1:29718881	AT1G79000	-	-	Chr1:29718854 Chr1:29718877	AT1G79000
hac1-2	SRR9672859	SALK_136314	Paired	100	Exon	AT1G79000	Chr1:29718877 Chr1:29718881	AT1G79000	-	-	-	-
hac1-2	SRR9672860	SALK_136314	Paired	100	Exon	AT1G79000	Chr1:29718847 Chr1:29718849	AT1G79000	-	-	-	-
fry1-6 rdr1-1	SRR9610023	SALK_020882 SAIL_672_F11	Paired	150	Exon Exon	AT5G63980 AT1G14790	-	-	Chr1:929893 Chr1:5095581 Chr1:5739502 Chr1:29466020 Chr3:3578652 Chr3:4737880 Chr3:21191611 Chr4:18009804 Chr5:16904968 Chr5:22038365 Chr5:25610545 Chr5:25610558 Chr5:25610648 Chr5:25610662	Chr1:929893 (none) AT1G14790 AT1G16780 AT1G09807 AT3G11400 AT3G14230 AT3G57270 AT4G38500 AT5G42270 AT5G54270 AT5G63980	Chr1:929893 Chr1:5095561 Chr1:5095579 Chr1:5095581 Chr1:5739502 Chr1:29466020 Chr3:3578652 Chr3:4737880 Chr3:21191611 Chr3:21191623 Chr4:18009804 Chr5:16904968 Chr5:22038365 Chr5:23409084 Chr5:25610545 Chr5:25610558 Chr5:25610648 Chr5:25610662	Chr1:929893 (none) AT1G14790 AT1G16780 AT1G09807 AT3G11400 AT3G14230 AT3G57270 AT4G38500 AT5G42270 AT5G54270 AT5G57785 AT5G63980
fry1-6 rdr1-1	SRR9610024	SALK_020882 SAIL_672_F11	Paired	150	Exon Exon	AT5G63980 AT1G14790	-	-	Chr1:5095564 Chr1:5095581 Chr1:29466020 Chr3:21191611 Chr4:7486609 Chr5:25610558 Chr5:25610648 Chr5:25610662	AT1G14790 AT1G09807 AT3G57270 AT4G12710 AT5G63980	Chr1:929893 Chr1:5095561 Chr1:5095564 Chr1:5095579 Chr1:5095581 Chr1:29466020 Chr3:21191611 Chr3:21191621 Chr3:21191623 Chr4:7486609 Chr5:25610548 Chr5:25610558 Chr5:25610648 Chr5:25610662	Chr1:929893 (none) AT1G14790 AT1G09807 AT3G57270 AT4G12710 AT5G63980
dxo1-1	SRR9273389	SALK_103157	Paired	150	Exon	AT4G17620	Chr4:9822588 Chr4:9822608 Chr4:9822613 Chr4:9822619	AT4G17620	-	-	Chr4:9822608 Chr4:9822619 Chr4:9822621	AT4G17620
dxo1-1	SRR9273390	SALK_103157	Paired	150	Exon	AT4G17620	Chr4:9822608 Chr4:9822619	AT4G17620	-	-	Chr4:9823041 Chr4:9823491	AT4G17620
dxo1-1	SRR9273391	SALK_103157	Paired	150	Exon	AT4G17620	Chr4:9822588 Chr4:9822608 Chr4:9822613 Chr4:9822619 Chr4:9822641	AT4G17620	-	-	Chr4:9822608 Chr4:9822619	AT4G17620
dxo1-2	SRR9273392	SALK_032903	Paired	150	Intron	AT4G17620	Chr4:9823331	AT4G17620	-	-	Chr4:9823335	AT4G17620
dxo1-2	SRR9273393	SALK_032903	Paired	150	Intron	AT4G17620	Chr4:9823331	AT4G17620	-	-	Chr4:9823335	AT4G17620
dxo1-2	SRR9273394	SALK_032903	Paired	150	Intron	AT4G17620	Chr4:9823331	AT4G17620	-	-	Chr4:9823335	AT4G17620
klu-1	SRR8759754	SALK_024697C	Paired	151	5'UTR	AT1G13710	Chr5:18731559	AT5G46210	-	-	-	-
klu-1	SRR8759755	SALK_024697C	Paired	151	5'UTR	AT1G13710	-	-	-	-	-	-
klu-1	SRR8759756	SALK_024697C	Paired	151	5'UTR	AT1G13710	-	-	-	-	-	-
hdc1	SRR8380416	SALK_043645	Paired	79	Intron	AT5G08450	Chr5:2728174	AT5G08450	-	-	Chr5:2728174	AT5G08450
hdc1	SRR8380417	SALK_043645	Paired	79	Intron	AT5G08450	Chr5:2728174	AT5G08450	-	-	Chr5:2728174	AT5G08450
hda19-3	SRR8380418	SALK_139445	Paired	79	Exon	AT4G38130	Chr4:17898728 Chr4:17898733	AT4G38130	-	-	-	-
hda19-3	SRR8380419	SALK_139445	Paired	79	Exon	AT4G38130	Chr3:1545370 Chr4:17898728 Chr4:17898733	AT3G05380 AT4G38130	-	-	-	-
atx3-1 atx4-1	SRR2927093	GK-128H01 SALK_060156	Paired	101	Exon Intron	AT3G61740 AT4G27910	-	-	-	-	-	-
atx3-1 atx4-1	SRR2927094	GK-128H01 SALK_060156	Paired	101	Exon Intron	AT3G61740 AT4G27910	-	-	-	-	-	-
brm-1 ref6-1	SRR2177554	SALK_030046 SALK_001018	Paired	101	5'UTR Exon	AT2G46020 AT3G48430	Chr2:832033 Chr2:18923325 Chr3:17939482 Chr3:17939492	AT2G02860 AT2G46020 AT3G48430	Chr3:17939482	AT3G48430	Chr2:832030 Chr2:18923325 Chr3:17939482 Chr3:17939492	AT2G02860 AT2G46020 AT3G48430
brm-1 ref6-1	SRR2177555	SALK_030046 SALK_001018	Paired	101	5'UTR Exon	AT2G46020 AT3G48430	Chr2:831888 Chr2:831891 Chr2:832033 Chr2:18923324 Chr2:18923325 Chr3:17939482 Chr3:17939492	AT2G02860 AT2G46020 AT3G48430	Chr2:831891 Chr2:832039 Chr3:17939483	AT2G02860 AT3G48430	Chr2:831888 Chr2:831891 Chr2:832030 Chr2:832039 Chr3:17939483 Chr3:17939492	AT2G02860 AT3G48430
brm-1 ref6-1	SRR2177556	SALK_030046 SALK_001018	Paired	101	5'UTR Exon	AT2G46020 AT3G48430	Chr2:832033 Chr2:18923324 Chr2:18923325 Chr3:17939482 Chr3:17939492	AT2G02860 AT2G46020 AT3G48430	-	-	Chr2:832030 Chr2:18923325	AT2G02860 AT2G46020
ros1-4	SRR1761518	SALK_045303	Paired	101	Exon	AT2G36490	-	-	-	-	Chr2:15308779	AT2G36490
ros1-4	SRR1761519	SALK_045303	Paired	101	Exon	AT2G36490	-	-	-	-	Chr2:15308779	AT2G36490
ros1-4	SRR1761520	SALK_045303	Paired	101	Exon	AT2G36490	Chr2:15308779	AT2G36490	-	-	Chr2:15308779	AT2G36490
swn-21	SRR2500948	GABI_783A01	Paired	151	Exon	AT4G02020	-	-	Chr4:887617	AT4G02020	Chr4:887617	AT4G02020
swn-21	SRR2962412	GABI_783A01	Paired	151	Exon	AT4G02020	Chr1:10478088 Chr2:15857359 Chr4:887461 Chr4:887466 Chr4:887619 Chr4:887631 Chr4:887644	AT1G29930 AT2G37860 AT4G02020	Chr4:887617 Chr4:887631	AT4G02020	Chr4:262926 Chr4:887617 Chr4:887629 Chr4:887631	AT4G00630 AT4G02020
swn-4	SRR6453495	SALK_109121	Paired	150	Exon	AT4G02020	-	-	-	-	Chr4:888601	AT4G02020
swn-4	SRR6453496	SALK_109121	Paired	150	Exon	AT4G02020	Chr4:211284 Chr4:211285 Chr4:211353 Chr4:211355 Chr4:888601 Chr4:888602	AT4G00450,AT4G00460 AT4G00460 AT4G02020	Chr4:211355	AT4G00460	Chr4:211355 Chr4:888601	AT4G00460 AT4G02020
swn-4	SRR6453497	SALK_109121	Paired	150	Exon	AT4G02020	Chr4:888601	AT4G02020	-	-	Chr4:888601	AT4G02020
Note: The previously annotated TISs and their overlapping genes are highlighted

## Sheet: Table S6
Supplementary Table S6. Comparison of the analysis of the rice whole-genome sequencing data performed using T-DNAreader, T-LOC, and TDNAscan.
Transgenic plant	Number of TISs identified by T-LOC	Number of TISs identified by TDNAscan	Number of TISs identified by T-DNAreader	T-DNAreader-identified sites	Note
46bAG_s1	1	1	1	TDNA-Chr7:18682184
46bAG_s2	1	1	1	Chr5:19582052-TDNA TDNA-Chr5:19582100
46bAG_s3	1	1	1	Chr12:21800547-TDNA TDNA-Chr12:21800573
46bGG_s1	1	2	1	TDNA-Chr9:16055022
46bGG_s2	2	2	2	Chr10:20298773-TDNA TDNA-Chr2:22434957 TDNA-Chr10:20299194
46bGG_s3	3	4	3	Chr1:9869323-TDNA Chr3:30258894-TDNA Chr10:22389504-TDNA TDNA-Chr1:9869339 TDNA-Chr3:30258946 TDNA-Chr10:22389734
46bM_s1	3	2	3	Chr3:16162663-TDNA Chr6:23546299-TDNA Chr12:25781155-TDNA TDNA-Chr3:16162675 TDNA-Chr6:23546335 TDNA-Chr12:25781156
46bM_s2	1	1	1	Chr7:29646237-TDNA TDNA-Chr7:29646259
46bM_s3	1	1	1	Chr7:29646237-TDNA TDNA-Chr7:29646259
46bg_s1	3	3	3	Chr7:22470994-TDNA Chr8:24473681-TDNA TDNA-Chr7:22471080 TDNA-Chr8:24473907 TDNA-Chr9:14196510
46bg_s2	2	0	1	Chr4:26168610-TDNA Chr4:26168669-TDNA Chr4:26168756-TDNA TDNA-Chr4:26168648 TDNA-Chr4:26168669 TDNA-Chr4:26168756	Fewer TISs were identified
46bg_s3	1	1	1	Chr7:444463-TDNA
49bAG_s1	2	2	2	Chr5:17686335-TDNA TDNA-Chr5:17686335 TDNA-Chr11:6167123
49bAG_s2	1	1	1	Chr2:30278648-TDNA TDNA-Chr2:30278671
49bAG_s3	1	1	1	Chr12:7263640-TDNA TDNA-Chr12:7263673
49bM_s1	1	0	1	Chr8:26556221-TDNA TDNA-Chr8:26556244
49bM_s2	1	1	1	Chr2:2368866-TDNA TDNA-Chr2:2368991
49bM_s3	1	1	1	Chr2:2368866-TDNA TDNA-Chr2:2368991
49bTm_s1	1	1	1	Chr7:7032258-TDNA TDNA-Chr7:7032258
49bTm_s2	2	2	2	Chr2:29141017-TDNA Chr4:33526887-TDNA TDNA-Chr2:29141047 TDNA-Chr4:33526898
49bTm_s3	1	1	1	Chr2:5941587-TDNA
49bg_s1	2	2	2	Chr3:33642362-TDNA Chr4:4206448-TDNA TDNA-Chr3:33642416 TDNA-Chr4:4206454
49bg_s2	2	2	2	Chr8:8568326-TDNA Chr9:20288131-TDNA TDNA-Chr8:8568343 TDNA-Chr9:20288212
49bg_s3	1	1	1	Chr9:14869540-TDNA TDNA-Chr9:14869567
50SE_s1	1	1	1	Chr9:13252313-TDNA
50SE_s2	2	3	2	Chr1:7136676-TDNA Chr6:9122675-TDNA TDNA-Chr1:7136708
50SE_s3	1	2	2	TDNA-Chr4:33263522 TDNA-Chr4:35862338	More TISs were identified
50G_s1	1	0	0	-	Fewer TIS was identified
50G_s2	5	6	6	Chr1:24927554-TDNA Chr1:24927557-TDNA Chr1:27122336-TDNA Chr1:27122339-TDNA Chr3:24094850-TDNA Chr6:29800233-TDNA Chr11:3073816-TDNA TDNA-Chr1:24927590 TDNA-Chr1:27122492 TDNA-Chr6:29800609 TDNA-Chr11:3074077 TDNA-Chr12:16384261	More TISs were identified
50G_s3	3	3	3	Chr4:35084017-TDNA Chr10:23355596-TDNA TDNA-Chr2:31327941 TDNA-Chr4:35084023
50DEP_s1	2	2	2	Chr1:2869613-TDNA Chr4:22894127-TDNA TDNA-Chr1:2869626 TDNA-Chr4:22894142
50DEP_s2	1	2	3	Chr7:23458417-TDNA Chr10:15432563-TDNA TDNA-Chr2:29302738 TDNA-Chr10:15432604	More TISs were identified
50DEP_s3	2	2	2	Chr7:17070197-TDNA Chr8:3699303-TDNA TDNA-Chr7:17070223 TDNA-Chr8:3699405
50bg_s1	1	2	1	Chr9:14335383-TDNA TDNA-Chr9:14335973
50bg_s2	1	1	1	Chr2:36198110-TDNA TDNA-Chr2:36198129
50bg_s3	2	2	1	Chr1:41123505-TDNA Chr1:41123572-TDNA TDNA-Chr1:41123101 TDNA-Chr1:41123109	Fewer TIS was identified
53SE_s1	2	2	2	Chr3:3463505-TDNA Chr9:21504269-TDNA TDNA-Chr3:3463528 TDNA-Chr9:21504280
53SE_s2	1	1	1	Chr8:5479922-TDNA TDNA-Chr8:5479985
53SE_s3	2	2	2	Chr9:22511290-TDNA Chr11:4893846-TDNA TDNA-Chr9:22511301 TDNA-Chr11:4893912
53G_s1	1	1	1	TDNA-Chr4:25901567
53G_s2	2	3	2	Chr1:2822372-TDNA Chr4:32679596-TDNA TDNA-Chr1:2822390 TDNA-Chr4:32679624
53G_s3	1	1	1	Chr2:37064555-TDNA TDNA-Chr2:37062666
53DEP_s1	1	1	1	Chr12:22432528-TDNA TDNA-Chr12:22432597
53DEP_s2	2	2	2	Chr3:28799539-TDNA Chr3:6405768-TDNA TDNA-Chr3:28799567 TDNA-Chr3:6405792
53DEP_s3	2	3	3	Chr4:26904571-TDNA Chr5:22766773-TDNA Chr5:28201142-TDNA TDNA-Chr4:26904585	More TISs were identified
53bg_s1	1	1	1	Chr2:23119869-TDNA TDNA-Chr2:23119971
53bg_s2	1	1	1	Chr2:21435125-TDNA TDNA-Chr2:21435151
53bg_s3	1	1	1	TDNA-Chr4:8535509
Total	75	79	77

## Sheet: Table S7
Supplementary Table S7. Summary of the T-DNAreader analysis of the Arabidopsis input ChIP-seq data.
Transgenic plant	Backbone vector	Background	Layout	Read length	AGI number	TISs identified by T-DNAreader	Identified genes containing TISs	Note
35S::TPR2-Myc	pGWB20	Col-0	Single	151	AT3G16830	Chr1:18728-TDNA TDNA-Chr3:4560679 Chr4:17442482-TDNA TDNA-Chr4:17442510	- AT3G13850 - -	Use pGWB420 sequence
ADCP1-GFP	pBar1001 (modified pCAMBIA1300)	Col-0	Paired	150	AT1G09320	Chr4:11441865-TDNA Chr4:16244764-TDNA TDNA-Chr4:16244790	AT4G21500 - -
ING1-GFP	pCAMBIA1305 - GFP	Col-0	Paired	150	AT3G24010	Chr4:11224807-TDNA Chr5:4182795-TDNA TDNA-Chr5:4182811	- AT5G13170 AT5G13170
GCN5-GFP	pCAMBIA1305 - GFP	Col-0	Paired	150	AT3G54610	Chr1:4365779-TDNA TDNA-Chr1:4365805 Chr3:101602-TDNA Chr3:5618494-TDNA	- - AT3G01310 AT3G16520
ADA2B-GFP	pCAMBIA1305 - GFP	Col-0	Paired	150	AT4G16420	TDNA-Chr1:5922187 Chr2:8398548-TDNA Chr3:1582754-TDNA TDNA-Chr3:1582796 Chr5:7438399-TDNA Chr5:23249610-TDNA TDNA-Chr5:23249619	- - AT3G05470 AT3G05470 AT5G22450 - -
ADA2A-GFP	pCAMBIA1305 - GFP	Col-0	Paired	150	AT3G07740	Chr2:19288873-TDNA TDNA-Chr2:19288888 TDNA-Chr3:458001	AT2G09765 AT2G09765 .
atx1-2	-	SALK_149002	Paired	150	AT2G31650	Chr2:8105294-TDNA TDNA-Chr2:13457903 Chr2:13457908-TDNA	- AT2G31650 AT2G31650	-
clf-28	-	SALK_139371	Paired	150	AT2G23380	Chr2:9956126-TDNA Chr2:9956619-TDNA TDNA-Chr2:9956144 Chr3:20651779-TDNA TDNA-Chr3:20651806 Chr5:26627008-TDNA TDNA-Chr5:26627025	AT2G23380 AT2G23380 AT2G23380 AT3G55660 (promoter) AT3G55660 (promoter) AT5G66690 (3'downstream) AT5G66690 (3'downstream)	-
atxr5-1 atxr6-1	-	SALK_130607 SAIL_240_H01	Paired	150	AT5G09790 AT5G24330	Chr5:3039911-TDNA TDNA-Chr5:3039934 TDNA-Chr5:8297144	AT5G09790 AT5G09790 AT5G24330
ddm1-1 rdr2 rdr6-11	-	ddm1-1 rdr2 (SALK_059661) rdr6-11	Paired	150	AT4G11130	Chr4:6782423-TDNA TDNA-Chr4:6782418	AT4G11130 AT4G11130
Note : ddm1-1 and rdr6-11 mutants are not T-DNA insertion lines
Note : The coverage signal drop was not observed at the predicted site

## Sheet: Table S8
Supplementary Table S8. EagleC analysis results using Hi-C contact maps from Col-0, clf-28, and clf-28 swn-4.
	chrom1	pos1	chrom2	pos2	++	+-	-+	--	Chromosomal Rearrangement
Col-0	Chr2	3510000	Chr2	3580000	1.218e-10	1.699e-13	0.9687	1.889e-07
	Chr5	14320000	Chr5	14510000	5.93e-14	0.9993	1.42e-10	4.199e-16
	Chr5	12890000	Chr5	14320000	2.679e-16	8.885e-10	0.8682	4.233e-17
clf-28	Chr1	15660000	Chr1	15860000	9.96e-15	0.8811	2.585e-17	1.73e-14
	Chr2	9950000	Chr3	20650000	6.118e-25	1	1	1.564e-23	Translocation
	Chr2	3650000	Chr3	20640000	3.109e-06	6.092e-07	4.51e-11	0.8622
	Chr5	14310000	Chr5	14510000	8.233e-17	1	6.235e-15	1.831e-18
	Chr5	12890000	Chr5	14320000	5.65e-18	1.853e-11	0.9412	2.917e-18
clf-28 swn-4	Chr2	9950000	Chr3	20650000	2.177e-24	1	1	1.511e-22	Translocation
	Chr4	200000	Chr4	6070000	1	2.576e-30	4.591e-27	1	Inversion
	Chr4	2060000	Chr5	11270000	4.867e-17	0.803	2.907e-17	4.351e-08
	Chr5	14310000	Chr5	14510000	9.323e-17	0.995	1.13e-13	4.452e-16

## Sheet: Table S9
Supplementary Table S9. Primer used in this study
Figure	Mutant name	Target gene containing T-DNA	Primer name	Sequence
Fig. 6A	rdr1-1	AT1G09807	F1	GTATATGGTGTGTCAATTCAAACCA
Fig. 6A	rdr1-1	AT1G09807	R1	GTTAAATTTCTTCATTGTAGGACGC
Fig. 6A	rdr1-1	AT1G09807	B1	ATGCTAGCATATGCCATGGAA
Fig. 6B	ref6-1	AT2G02860	F1	CCCACCTGATACATATATGACCAG
Fig. 6B	ref6-1	AT2G02860	R1	CCACTCTCAACTCTTATCAAACG
Fig. 6B	ref6-1	AT2G02860	B1	ATTTTGCCGATTTCGGAAC
Fig. 6C	rve5-2	AT3G09520	F1	GATCGATACTTTTGTAATGACTCTAATT
Fig. 6C	rve5-2	AT3G09520	R1	CGATGATCGTATCTAGATCTTCGAC
Fig. 6C	rve5-2	AT3G09520	B1	GTGGATTGATGTGATATCTCC
Fig. 6D	cmt3-11	AT3G26100	F1	CATTCTTCGATCGTTCGTTTTCA
Fig. 6D	cmt3-11	AT3G26100	R1	GGTTAGCTGCTAAAGGAAACTCT
Fig. 6D	cmt3-11	AT3G26100	B1	ATTTTGCCGATTTCGGAAC
Fig. 6E	swn-4	AT4G00460	F1	TCTCTGTTGTGGCTTCTT
Fig. 6E	swn-4	AT4G00460	R1	GGAGACGCAAATCTTGT
Fig. 6E	swn-4	AT4G00460	B1	GCGATAGAAGGCGATGCG
Fig. 6F	swn-4	AT4G09630	F1	CTCACCCAATCAGATCGT
Fig. 6F	swn-4	AT4G09630	R1	ACCCGATGCTAACAGAG
Fig. 6F	swn-4	AT4G09630	B1	ATTAAAAACGTCCGCAATGTG
Fig. 6G	swi3d-1	AT5G12440	F1	GTCCTATATGGAAAGCCACATATTT
Fig. 6G	swi3d-1	AT5G12440	R1	ATTGTGATTGACAAACAAGGTAACC
Fig. 6G	swi3d-1	AT5G12440	B1	ATTTTGCCGATTTCGGAAC
Fig. 7D	swn-4, swn-21	AT4G00460	F1	TCTCTGTTGTGGCTTCTT
Fig. 7D	swn-4, swn-21	AT4G00460	R1	GGAGACGCAAATCTTGT
Fig. 7D	swn-4, swn-21	AT4G09630	F2	GTCAGTGTTCGATTTCTCT
Fig. 7D	swn-4, swn-21	AT4G09630	R2	ACCCGATGCTAACAGAG
